# Supplementary material for: β-1,6-Glucan plays a central role in the structure and remodeling of the bilaminate fungal cell wall
Source: eLife. 2024 Dec 5;13:RP100569. doi: 10.7554/eLife.100569 (PMC11620752; doi:10.7554/eLife.100569)
Supplement: Figure 1—source data 1. [file elife-100569-fig1-data1.xlsx]

## Sheet: Panels a and b
	AI fraction				AS fraction					SDS-beta-ME fraction
% cell wall polymers / total cell wall					% cell wall polymers / total cell wall					% cell wall polymers / total cell wall
β-1,6-glucan	13.4687	18.6748	15.5388		β-1,6-glucan	8.43134	7.61164	5.36773		glucose	0	0	1.3802
β-1,3-glucan	19.9791	25.4839	26.024		β-1,3-glucan	8.30465	5.95964	7.14065		mannan	6.42682	7.00893	6.94419
mannan	0.224545	0.485412	0.712307		mannan	22.0663	16.9385	19.1888		chitin	0.00992911	0	0
chitin	3.12565	3.47173	2.36989		chitin	0.188612	0.151475	0.0837904		protein	12.5352	9.1847	11.7481
protein	1.79108	3.66091	1.70901		protein	3.44807	1.36828	1.79254
