# Supplementary material for: β-1,6-Glucan plays a central role in the structure and remodeling of the bilaminate fungal cell wall
Source: eLife. 2024 Dec 5;13:RP100569. doi: 10.7554/eLife.100569 (PMC11620752; doi:10.7554/eLife.100569)
Supplement: Figure 2—figure supplement 1—source data 1. [file elife-100569-fig2-figsupp1-data1.xlsx]

## Sheet: Panel a
		% cell wall polymers in AI fraction / total cell wall
		β-1,6-glucan				β-1,3-glucan				mannan				chitin				protein
Control		13.4687	18.6748	15.5388		19.9791	25.4839	26.024		0.224545	0.485412	0.712307		3.12565	3.47173	2.36989		1.79108	3.66091	1.70901
Stationary phase		13.4561	14.9884	16.9366		23.6435	23.1402	20.3748		0.7742	0.257995	0.258655		2.86857	3.45555	3.02039		3.38325	2.40018	2.77927
Hyphae		14.3916	12.9719	13.294		24.4401	30.1117	26.1491		0.850568	0	0.684121		9.47502	10.4093	8.37562		3.17742	4.70461	3.50317
Biofilm		15.4006	16.6131	14.8005		29.0559	28.6306	27.0822		0.568214	0.493389	0.487514		3.46912	3.36977	3.30537		2.39948	1.91814	2.17107
30°C		12.9104	11.034	11.588		18.0561	24.3658	19.9192		1.84466	0.624124	0.398295		3.23145	2.26703	2.87447		2.53479	1.22972	1.50279
Hypoxia (1% O2)		15.8991	14.6058	15.6959		25.8961	23.7304	25.3258		0.224702	0.424693	1.29849		2.3383	2.08326	2.04812		3.22598	2.3677	2.86139
NaCl 1M		9.37696	8.77661	11.2269		19.3862	19.2637	18.4349		0.384432	0.162694	0.160965		3.04435	2.79573	3.16824		2.1706	0.779408	2.26151
2% lactate		1.22516	7.7504	4.48563		6.37443	15.0158	16.0504		0	0	0.771592		1.1507	1.99703	1.97002		1.87097	4.26866	1.33601
H2O2 1.5 mM		14.3078	12.8488	13.6616		20.6663	23.4981	20.9817		0.760677	0.70361	0.302455		3.68962	3.12381	2.71729		2.98229	0.719014	1.99014
CFW 400 µg/mL		10.7274	11.469	12.6216		24.5653	20.9198	20.6453		0.490154	0.299348	0		3.70554	3.81412	3.86185		2.68711	2.4963	1.79394
CR 50 µg/mL		17.8324	15.6671	17.6847		32.5259	29.7866	20.897		0	0.614235	0.43388		5.91943	4.25207	5.66213		4.66958	2.39822	4.82627
Nikkomycin Z 16 µg/mL		13.9594	12.9522	13.2151		20.4238	18.3804	17.2755		0.493277	0.164154	0.229254		0.627237	0.899764	0.687937		0.412698	0.531017	1.13872
Tunicamycin 0.125 µg/mL		20.1643	18.1989	19.5123		28.5038	26.2828	28.5001		0.599056	0.596518	0.850585		4.80433	3.86416	4.15297		2.22857	1.17684	2.67967
Caspofungin 0.015 µg/mL		16.6352	16.3853	15.8399		22.623	17.8591	20.1216		1.01528	0.918803	0.546568		4.7109	4.89569	4.4434		1.91805	2.10873	2.17067
Control (pH 5.4)		22.0463	21.5733	21.5861		29.0514	19.963	23.9938		0.283791	0.695871	0		3.56899	3.75336	3.55169		1.10688	3.54867	3.19501
pH=4		19.9164	18.9965	18.8721		21.8227	17.0008	19.5596		0.857112	0.267345	0.435336		4.19208	2.48982	2.57852		2.4838	1.32423	1.16318
pH=7.5		16.7244	23.8889	19.9787		17.8111	21.849	18.8793		0.236731	0.263531	0.19398		3.97124	3.98798	3.63228		4.96553	2.67062	3.11319
Acetate 50 mM		23.2654	22.2868	23.5725		19.1476	24.4581	20.8126		0	0.317419	0		2.39379	3.43025	3.01792		1.23675	2.71636	3.08469
Propionate 20 mM		21.8118	21.568	21.9514		17.4654	19.5845	20.3949		0.229899	0	0		3.40015	3.55981	3.76634		0.490889	2.17107	3.60281
Butyrate 15 mM		18.7262	19.7377	20.9337		18.7038	19.2916	20.0548		0	0	0		2.70871	2.85562	3.16012		1.10695	4.20977	3.64211

## Sheet: Panel b
		% cell wall polymers in AS fraction / total cell wall
		β-1,6-glucan				β-1,3-glucan				mannan				chitin				protein
Control		8.43134	7.61164	5.36773		8.30465	5.95964	7.14065		22.0663	16.9385	19.1888		0.188612	0.151475	0.0837904		3.44807	1.36828	1.79254
Stationary phase		5.91722	6.44161	6.72626		8.00421	6.10667	7.03385		21.872	19.4366	22.9547		0.269706	0.206632	0.210908		3.0367	1.43489	2.28042
Hyphae		3.5388	5.28772	5.144		4.48558	4.77575	4.60238		10.2252	14.1912	14.166		0.593079	0.243996	0.629546		3.20721	2.7976	4.87454
Biofilm		5.31889	5.01804	4.34538		5.59527	5.6065	5.34087		23.9077	26.546	25.4612		0.167	0.168046	0.15801		3.61397	3.84757	4.42659
30°C		6.40182	4.20241	4.80465		8.49189	8.02398	7.18833		28.3664	28.7649	25.0626		0.20514	0.109871	0.137341		2.07566	1.86714	2.60992
Hypoxia (1% O2)		6.20902	6.30709	6.70636		6.76429	6.19466	6.00351		26.1985	24.7043	21.4993		0.13172	0.121183	0.105698		2.5618	2.12171	1.98708
NaCl 1M		5.15935	6.20098	8.85528		10.2487	10.0063	9.7222		15.3053	15.537	18.0227		0.313875	0.17311	0.194372		2.69874	1.10219	2.82829
2% lactate		1.88643	1.42712	2.45553		3.60554	3.01366	4.98813		17.3547	16.5269	21.4067		0.150802	0.125409	0.104181		2.06154	3.16997	1.72043
H2O2 1.5 mM		4.8168	6.00803	7.83072		7.35274	6.83046	7.30143		18.542	14.6826	18.1205		0.357476	0.1794	0.174528		2.63143	0.827615	1.88198
CFW 400 µg/mL		7.33675	7.38994	7.08238		8.10991	7.73558	8.49684		19.5599	17.7405	19.1536		0.359131	0.22806	0.18281		3.25554	1.65435	2.04111
CR 50 µg/mL		4.75656	4.89251	5.99854		5.4569	6.12144	6.20089		18.0435	21.2086	22.3331		0.0989104	0.0781457	0.101393		1.98616	1.42312	2.08585
Nikkomycin Z 16 µg/mL		6.50957	8.57552	7.85967		10.5041	13.6974	9.2017		27.5293	23.3742	23.2542		0.104387	0.101934	0.113618		2.10935	1.56364	1.28269
Tunicamycin 0.125 µg/mL		6.93767	5.82841	4.78013		7.91611	8.35405	4.413		15.8672	19.7057	18.8098		0.0968668	0.0861696	0.0783654		1.74333	1.55869	1.69713
Caspofungin 0.015 µg/mL		4.80329	3.44361	2.97937		6.02614	2.90398	2.69643		24.5321	24.3523	22.2559		0.115314	0.102029	0.100243		1.0246	1.79681	1.94088
Control (pH 5.4)		5.30628	6.7918	6.83102		5.16453	5.4098	5.01541		18.2028	20.8195	18.4237		0.110281	0.139473	0.13358		1.46108	2.39544	1.62308
pH=4		6.34805	8.1091	7.62398		6.77233	8.42432	7.44242		22.4699	18.1379	17.5597		0.112765	0.0814713	0.0775252		2.4582	2.38786	2.15516
pH=7.5		4.16789	4.86619	4.88789		3.94773	4.15784	4.60336		9.75729	12.1885	13.4375		0.079837	0.127624	0.080551		2.87769	3.13396	3.0259
Acetate 50 mM		7.98825	5.92566	7.6137		6.41633	4.34014	6.10012		21.8816	19.9578	18.8535		0.0983204	0.13761	0.139449		1.85512	3.69436	4.6475
Propionate 20 mM		6.45781	6.69709	4.9998		5.6376	4.64002	3.83291		27.0602	25.655	24.1622		0.122668	0.159677	0.152111		1.9849	2.75002	4.36222
Butyrate 15 mM		5.57717	6.87218	5.5345		4.79146	5.43292	4.80565		22.3686	18.9828	19.0676		0.107362	0.141804	0.129407		4.68824	2.18142	2.7584

## Sheet: Panel c
		% cell wall polymers in SDS-beta-ME fraction / total cell wall
		β-glucan				mannan				chitin				protein
Control		0	0	1.3802		6.42682	7.00893	6.94419		0.009929	0	0		12.5352	9.1847	11.7481
Stationary phase		0.741606	0.87028	1.18097		5.19882	4.93147	4.98283		0	0	0.05066		10.834	16.3295	11.2097
Hyphae		2.0902	1.8813	0		3.91775	3.85786	6.17442		0.145776	0.085165	0.13558		19.4617	8.682	12.2676
Biofilm		0.219832	0	0.205411		3.59692	3.78715	3.81125		0	0	0		6.68707	4.00177	8.4047
30°C		0	0.814657	0.236614		5.84068	4.64918	6.76907		0	0	0		10.0411	12.0472	16.9087
Hypoxia (1% O2)		0	0	0		3.9372	4.58333	4.11195		0	0	0		6.61325	12.7559	12.3563
NaCl 1M		1.21457	1.24341	0		4.61494	5.68756	5.83167		0	0	0		26.082	28.2713	19.293
2% lactate		0	0	0		20.1248	9.38584	12.8709		0.316502	0	0		43.8784	37.3192	31.8406
H2O2 1.5 mM		0.912107	0.626853	0		5.94772	9.21646	7.58016		0	0	0.022168		17.033	20.7353	17.4354
CFW 400 µg/mL		0.887778	0.737531	1.4999		4.28853	5.92423	5.85926		0.026209	0	0.017897		14.0008	19.5913	16.7435
CR 50 µg/mL		0	0.279384	0		4.59566	6.09158	5.8912		0	0	0.010442		4.11505	7.18698	7.87465
Nikkomycin Z 16 µg/mL		0	0.294212	0.86497		7.94026	6.74074	7.05635		0	0	0		9.38659	12.7248	17.8203
Tunicamycin 0.125 µg/mL		0	0.329463	0.475477		5.82276	5.64354	6.95603		0	0	0		5.31608	8.37471	7.09444
Caspofungin 0.015 µg/mL		0.537332	0.240815	0.255687		9.6567	8.42831	10.9341		0.015404	0	0		6.38666	16.5645	15.7153
Control (pH 5.4)		1.00923	0	0		9.78399	11.7542	12.7546		0	0	0		2.90445	3.15561	2.89204
pH=4		0.347504	0.697173	0.988462		5.24451	6.38198	7.40325		0	0	0		6.97465	15.7016	14.1407
pH=7.5		0	0.736389	0.90712		9.15382	8.15879	10.0504		0	0	0		26.3068	13.9707	17.2098
Acetate 50 mM		0	0	0		10.6255	9.1049	9.14699		0	0	0		5.09128	3.63066	3.01105
Propionate 20 mM		1.15414	0	2.58053		8.74211	8.33974	5.70188		0	0	0		5.44246	4.87503	4.49291
Butyrate 15 mM		1.52439	0	0		9.66944	9.02029	11.0255		0	0	0		10.0276	11.2739	8.88817
