# Supplementary material for: β-1,6-Glucan plays a central role in the structure and remodeling of the bilaminate fungal cell wall
Source: eLife. 2024 Dec 5;13:RP100569. doi: 10.7554/eLife.100569 (PMC11620752; doi:10.7554/eLife.100569)
Supplement: Figure 2—figure supplement 2—source data 1. [file elife-100569-fig2-figsupp2-data1.xlsx]

## Sheet: Panel a
	% of branching point of b-1,6-glucan
Control	6.96496
	6.00383
	6.24519
Stationary phase	6.24519
	5.30992
	5.23665
Hyphae	6.96065
	6.40897
	5.70213
Biofilm	6.10727
	6.04262
	5.91763
30°C	5.40043
	4.2238
	5.46508
Hypoxia (1% O2)	5.39181
	4.80565
	5.9047
NaCl 1M	8.26227
	7.62439
	7.77955
2% Lactate	5.1289
	4.16777
	5.42198
H2O21.5 mM	5.71506
	5.16338
	5.34871
CFW 400 µg/mL	5.90901
	5.15907
	4.83151
CR 50 µg/mL	5.66765
	4.24966
	5.90039
Nikkomycin Z 16 µg/mL	5.40474
	4.43068
	5.9047
Tunicamycin 0.125 µg/mL	5.37457
	5.15476
	6.17192
Caspofungin 0.015 µg/mL	5.92194
	5.44353
	6.36587
Control (pH 5.4)	6.15899
	4.96081
	5.38366
pH=4	7.1115
	7.48647
	7.76662
pH=7.5	7.47785
	8.65879
	8.46484
Acetate 50 mM	5.91763
	5.15907
	5.30431
Propionate 20 mM	5.37026
	5.10735
	4.7686
Butyrate 15 mM	5.16769
	4.98236
	5.30493

## Sheet: Panel b
	% of branching point of b-1,3-glucan
Control	5.04
	5.74
	5.22
Stationary phase	5.46
	5.77
	5.95
Hyphae	7.03
	7.31
	7.6
Biofilm	5.8
	5.84
	5.86
30°C	4.41
	4.44
	3.9
Hypoxia (1% O2)	6.1
	6.06
	5.12
NaCl 1M	7.13
	7.5
	7.35
2% Lactate	7.31
	7.51
	7.33
H2O21.5 mM	5.18
	5.37
	5.86
CFW 400 µg/mL	4.48
	5.23
	5.45
CR 50 µg/mL	4.74
	4.93
	4.09
Nikkomycin Z 16 µg/mL	5.99
	4.8
	4.99
Tunicamycin 0.125 µg/mL	5.84
	5.49
	4.45
Caspofungin 0.015 µg/mL	5.42
	5.35
	4.42
Control (pH 5.4)	7.31
	7.14
	6.44
pH=4	5.48
	5.16
	5.14
pH=7.5	5.28
	5.4
	5.51
acetate 50 mM	6.85
	6.89
	6.24
propionate 20 mM	6.65
	6.4
	5.97
butyrate 15 mM	6.53
	6.66
	5.75
