# Supplementary material for: β-1,6-Glucan plays a central role in the structure and remodeling of the bilaminate fungal cell wall
Source: eLife. 2024 Dec 5;13:RP100569. doi: 10.7554/eLife.100569 (PMC11620752; doi:10.7554/eLife.100569)
Supplement: Figure 2—source data 1. [file elife-100569-fig2-data1.xlsx]

## Sheet: Panel a
	Control			Stationary phase			Hyphae			Biofilm			30°C			Hypoxia (1% O2)			NaCl 1M			2% Lactate			H2O21.5 mM			CFW 400 µg/mL			CR 50 µg/mL			Nikkomycin Z 16 µg/mL			Tunicamycin 0.125 µg/mL			Caspofungin 0.015 µg/mL			Control (pH 5.4, MES 100 mM)			pH=4			pH=7.5
% cell wall polymers (AI + AS) / total cell wall
β-1,6-glucan	21.9	26.2865	20.9065	19.3733	21.43	23.6628	17.9304	18.2596	18.438	20.7195	21.6311	19.1459	19.3122	15.2364	16.3927	22.1081	20.9129	22.4023	14.5363	14.9776	20.0822	3.11159	9.17752	6.94116	19.1246	18.8568	21.4923	18.0642	18.8589	19.704	22.5889	20.5596	23.6833	20.469	21.5278	21.0748	27.102	24.0274	24.2924	21.4385	19.8289	18.8193	27.3526	28.3651	28.4171	26.2645	27.1055	26.4961	20.8923
β-1,3-glucan	28.2837	31.4436	33.1647	31.6477	29.2469	27.4086	28.9256	34.8874	30.7515	34.6512	34.2371	32.4231	26.548	32.3898	27.1075	32.6604	29.9251	31.3293	29.6349	29.27	28.1571	9.97997	18.0294	21.0385	28.0191	30.3285	28.2831	32.6752	28.6553	29.1421	37.9828	35.908	27.0979	30.9279	32.0778	26.4772	36.4199	34.6368	32.9131	28.6492	20.7631	22.818	34.2159	25.3728	29.0092	28.595	25.4251	27.002	21.7588
mannan	22.2909	17.4239	19.9011	22.6462	19.6946	23.2134	11.0757	14.1912	14.8501	24.4759	27.0393	25.9487	30.211	29.389	25.4609	26.4232	25.1289	22.7978	15.6897	15.6997	18.1837	17.3547	16.5269	22.1782	19.3027	15.3862	18.423	20.0501	18.0399	19.1536	18.0435	21.8229	22.7669	28.0226	23.5383	23.4835	16.4663	20.3022	19.6604	25.5474	25.2711	22.8025	18.4866	21.5154	18.4237	23.327	18.4052	17.9951	9.99402
chitin	3.31426	3.62321	2.45368	3.13828	3.66218	3.2313	10.0681	10.6533	9.00517	3.63612	3.53782	3.46338	3.43658	2.3769	3.01181	2.47002	2.20445	2.15382	3.35822	2.96884	3.36261	1.30151	2.12244	2.0742	4.0471	3.30321	2.89182	4.06467	4.04218	4.04466	6.01834	4.33022	5.76352	0.731624	1.0017	0.801556	4.90119	3.95033	4.23133	4.82622	4.99772	4.54364	3.67927	3.89284	3.68527	4.30484	2.5713	2.65605	4.05108
protein	5.23915	5.02919	3.50155	6.41995	3.83508	5.05969	6.38464	7.50221	8.37771	6.01345	5.76571	6.59766	4.61045	3.09687	4.1127	5.78778	4.48941	4.84847	4.86933	1.8816	5.0898	3.93251	7.43863	3.05644	5.61371	1.54663	3.87212	5.94265	4.15065	3.83505	6.65574	3.82135	6.91211	2.52204	2.09466	2.42141	3.9719	2.73553	4.3768	2.94265	3.90554	4.11155	2.56796	5.94411	4.81809	4.942	3.71209	3.31834	7.84323
[truncated: 11 more columns]

## Sheet: Panel b
	B-1,6-glucan mean MW (KDa)
Control	59.4751
	57.0271
	56.5293
Stationary phase	57.869
	58.8727
	58.0099
Hyphae	44.1584
	40.7244
	43.8795
Biofilm	59.6057
	59.3088
	59.4076
30°C	46.1137
	42.3275
	45.0346
Hypoxia (1% O2)	55.0441
	54.483
	55.1499
NaCl 1M	47.6437
	36.7487
	41.7588
2% Lactate	18.7325
	13.5489
	24.5547
H2O21.5 mM	56.4895
	56.4293
	55.0723
CFW 400 µg/mL	52.357
	49.7713
	52.2165
CR 50 µg/mL	57.9246
	55.0448
	57.4337
Nikkomycin Z 16 µg/mL	53.911
	52.2666
	55.224
Tunicamycin 0.125 µg/mL	57.9971
	56.4642
	58.0508
Caspofungin 0.015 µg/mL	69.0892
	71.866
	69.0804
Control (pH 5.4)	54.9702
	56.5546
	57.9394
pH=4	49.1363
	49.9097
	50.1145
pH=7.5	44.3169
	46.3593
	46.6092
Acetate 50 mM	62.2769
	65.8597
	64.5618
Propionate 20 mM	67.1149
	68.1887
	70.0599
Butyrate 15 mM	63.8959
	65.3977
	67.5545

## Sheet: Panel c
	% of branching point of B-1,6-glucan
Control	6.96496
	6.00383
	6.24519
Stationary phase	6.24519
	5.30992
	5.23665
Hyphae	6.96065
	6.40897
	5.70213
Biofilm	6.10727
	6.04262
	5.91763
30°C	5.40043
	4.2238
	5.46508
Hypoxia (1% O2)	5.39181
	4.80565
	5.9047
NaCl 1M	8.26227
	7.62439
	7.77955
2% Lactate	5.1289
	4.16777
	5.42198
H2O21.5 mM	5.71506
	5.16338
	5.34871
CFW 400 µg/mL	5.90901
	5.15907
	4.83151
CR 50 µg/mL	5.66765
	4.24966
	5.90039
Nikkomycin Z 16 µg/mL	5.40474
	4.43068
	5.9047
Tunicamycin 0.125 µg/mL	5.37457
	5.15476
	6.17192
Caspofungin 0.015 µg/mL	5.92194
	5.44353
	6.36587
Control (pH 5.4)	6.15899
	4.96081
	5.38366
pH=4	7.1115
	7.48647
	7.76662
pH=7.5	7.47785
	8.65879
	8.46484
Acetate 50 mM	5.91763
	5.15907
	5.30431
Propionate 20 mM	5.37026
	5.10735
	4.7686
Butyrate 15 mM	5.16769
	4.98236
	5.30493
