# Supplementary material for: β-1,6-Glucan plays a central role in the structure and remodeling of the bilaminate fungal cell wall
Source: eLife. 2024 Dec 5;13:RP100569. doi: 10.7554/eLife.100569 (PMC11620752; doi:10.7554/eLife.100569)
Supplement: Figure 3—figure supplement 1—source data 1. [file elife-100569-fig3-figsupp1-data1.xlsx]

## Sheet: Panel a
		% cell wall polymers in AI fraction / total cell wall
		β-1,6-glucan				β-1,3-glucan				mannan				chitin				protein
WT		12.2026	14.6863	10.8563		23.4267	18.8726	17.1477		0	0.455841	1.08629		1.97374	3.08229	2.60418		1.11955	1.80344	1.84576
PMRP1-CHS1/chs1Δ		16.6249	19.4648	20.3871		22.7255	21.8094	23.4005		0.345648	0.425024	0.255608		2.73641	2.18264	3.44438		0.157148	1.87957	2.27467
chs2Δ/Δ		14.1584	19.9669	10.9401		21.7643	24.2497	13.4433		0.441679	0.321701	0.419099		2.66566	3.65947	1.28979		0.0488245	1.68414	1.24109
chs3Δ/Δ		9.52907	10.4588	10.2634		15.6347	15.3876	15.0533		0.262666	0.123552	0.212318		0.270349	0.203678	0.159678		0	0	0.491735
fks1Δ		9.53748	10.2078	13.6368		14.6833	13.5954	16.9367		0.54333	0.512238	0.465952		3.41514	2.68835	4.49483		0.865138	1.64699	1.97827
WT (pH 7.5)		15.9451	15.9282	16.7418		19.2417	17.2104	19.1102		0.504527	0.407025	0.386448		2.78144	2.21537	2.48163		1.32664	1.18716	1.37812
phr1Δ/Δ		16.6515	13.2661	17.2895		18.8795	18.1526	16.5262		0.617199	0.462417	0.386891		4.22657	3.16627	3.82809		1.44423	1.52527	1.44522
WT (pH 5.5)		14.1382	12.8832	18.1194		21.9562	17.7347	18.0804		1.05918	0.226939	0.624767		2.45631	2.09139	2.14174		0.673537	0.701262	1.4161
phr2Δ/Δ		4.78467	6.40663	7.30701		21.9679	26.4653	30.0219		0.514958	0.607839	0.497391		5.94008	8.50717	9.75512		1.10751	0.824186	2.80305
och1Δ/Δ		40.6018	38.6652	41.8657		30.6001	27.3186	22.1238		0	0.329997	0.598573		10.1076	7.70657	6.28626		2.20752	2.03576	5.38517
mnn9Δ/Δ		29.6198	30.1961	30.4148		34.9917	33.6894	27.5315		0.514145	0	0.283866		7.51384	5.17658	6.7861		1.3091	0.232881	3.79967
mnn2/22/21/23/24/26Δ/Δ		35.7211	28.1289	27.1056		30.38	38.6006	31.6327		0	0	0.329574		7.77622	5.72721	6.28438		2.10979	1.5042	2.79977
mnt1/mnt2Δ/Δ		10.5278	12.5947	11.9691		26.4182	21.0854	17.3375		0.424517	0.545	2.15379		4.28134	4.55778	4.22835		0.170082	2.27044	1.21087
cwh41Δ/Δ		16.069	14.777	17.111		27.1401	19.7559	16.0805		0.49768	0.382288	0.496756		3.63982	3.15042	3.15196		0.543583	1.68014	1.36238
rot2Δ/Δ		5.20608	3.79792	4.29059		43.921	38.6338	40.1933		0	0.885377	0		11.839	10.3598	11.0488		1.52795	3.65645	3.24647
kre5Δ/Δ		2.80186	2.38372	3.08875		44.8008	40.6791	35.606		1.17019	0.380803	0		14.4437	12.8941	13.4587		2.99707	4.62652	3.1916
kre1Δ/Δ		10.3038	8.36975	9.54052		30.5849	21.3217	21.8516		0	0.337979	0.418112		4.15522	2.8442	2.75722		0.775148	2.64546	1.21696
kre6Δ/Δ		7.19918	6.57381	8.83069		40.7278	38.2043	36.1813		0	0.318411	0.459892		8.63497	10.1518	11.985		1.30726	2.6283	1.53376
skn1Δ/Δ		13.5751	12.8918	12.969		15.286	19.5126	19.9079		0.77776	0	0.666134		2.27412	2.70585	2.37977		0.608354	1.93801	1.43245
kre62Δ/Δ		9.57685	10.7681	9.08981		18.7766	19.3728	16.1653		0.310881	0.255634	0.370207		2.64991	2.85669	2.37769		2.12793	1.46024	1.25578
skn2Δ/Δ		12.0886	11.8823	11.9226		27.692	25.9094	25.9488		0.343509	0.303238	0.666236		3.95084	3.76896	3.86574		1.6096	1.91721	1.04931
kre6/skn1Δ/Δ		7.24353	6.66674	7.06143		29.8571	37.2418	36.3014		0.359284	0.352839	0.879798		11.6449	11.5626	9.82784		3.32218	3.25649	3.62598
kre6/kre62/skn2/skn1Δ/Δ		0	0	0		49.3752	45.4359	48.6345		0.293604	0.380368	0.398248		9.23704	9.81659	8.95396		5.7016	2.74853	4.29263
kre6/kre62/skn2/skn1Δ/Δ+ PACT1-KRE6		16.1063	16.8173	14.8071		17.3223	16.8546	16.8834		0.327423	0.375053	1.05025		4.37563	4.52347	4.65512		2.41601	1.87832	3.35121

## Sheet: Panel b
		% cell wall polymers in AS fraction / total cell wall
		β-1,6-glucan				β-1,3-glucan				mannan				chitin				protein
WT		4.17801	4.18238	3.9376		6.62905	6.44526	5.954		29.0742	28.2366	26.6099		0.112466	0.176003	0.145934		2.09958	1.28022	2.20546
PMRP1-CHS1/chs1Δ		5.34465	4.1592	5.28428		6.57902	5.70826	6.67471		15.8092	13.9329	15.775		0.177755	0.105625	0.112231		1.08213	2.31187	2.95832
chs2Δ/Δ		4.28559	3.47312	2.51543		5.81394	3.62782	4.88941		29.5645	27.1677	21.2583		0.17045	0.145884	0.0461866		0.573294	1.19539	2.24351
chs3Δ/Δ		6.02392	8.93782	4.86355		10.1652	11.0797	9.33175		32.3012	32.2203	25.229		0.140469	0.136452	0.0592567		0.0530549	1.31953	1.39711
fks1Δ		2.16637	2.13333	2.88109		2.62715	2.52751	2.70857		23.4519	27.5008	29.6164		0.104921	0.0814487	0.123763		1.86337	2.94106	3.78745
WT (pH 7.5)		4.23036	2.593	3.49732		4.33638	3.29016	4.53939		23.263	17.379	21.3984		0.0991351	0.0716686	0.0921506		1.26286	2.82017	3.0805
phr1Δ/Δ		2.97359	1.68246	1.6381		3.43601	2.86494	2.42602		30.965	21.9599	18.3862		0.15252	0.104315	0.133458		1.45422	3.24031	2.45989
WT (pH 5.5)		4.3584	4.08117	2.55516		5.65418	4.91967	3.21187		26.8851	22.0602	18.6316		0.118797	0.0811215	0.0778024		0.77344	2.2216	3.37747
phr2Δ/Δ		1.85757	1.45464	1.98623		8.91888	6.91395	8.19708		22.9081	22.8761	23.9897		0.581401	0.151109	0.300396		1.73175	2.14722	3.39426
och1Δ/Δ		5.75474	4.66423	4.08355		3.09751	3.46373	3.83284		1.88116	3.86305	2.49545		0.145027	0.128643	0.112909		1.21258	2.05075	2.05616
mnn9Δ/Δ		6.28935	6.17752	5.37749		4.6987	6.17911	3.36528		3.32512	3.14652	2.70167		0.146371	0.146033	0.137359		1.7972	1.79494	2.04163
mnn2/22/21/23/24/26Δ/Δ		5.89743	4.12041	6.03352		5.33899	3.93712	4.38125		4.02443	2.82416	3.82476		0.204075	0.131493	0.192417		2.71569	1.11621	2.99321
mnt1/mnt2Δ/Δ		3.78979	2.7449	3.57621		8.93045	4.9155	7.31989		25.7835	23.8496	28.9553		0.135014	0.185241	0.131979		1.74205	1.74477	1.8163
cwh41Δ/Δ		6.51191	4.34257	7.12528		8.73177	4.98075	9.27392		15.4483	10.6434	16.3836		0.153362	0.154963	0.16627		1.43866	2.45354	2.41784
rot2Δ/Δ		0.965561	0.67268	0.743469		7.11116	5.40328	6.79315		14.8531	17.6704	16.4649		0.237962	0.332846	0.341852		2.43814	3.10524	3.06893
kre5Δ/Δ		0.384941	0.150856	0.438014		14.6848	17.9702	18.8451		7.93218	9.99954	12.1665		0.247011	0.421758	0.384767		1.08148	1.7076	1.82824
kre1Δ/Δ		4.37579	3.40975	3.6035		9.75576	7.90617	7.4399		25.935	23.4004	27.5666		0.226165	0.169238	0.103233		1.2598	2.56012	1.62261
kre6Δ/Δ		1.68468	1.28084	1.06118		12.5847	13.9536	11.3068		20.3644	14.6233	18.195		0.221503	0.227542	0.271773		1.10353	1.55157	2.26055
skn1Δ/Δ		3.35706	3.24872	2.7898		5.12383	5.09554	4.42611		24.0327	24.5918	22.0015		0.104869	0.104555	0.109818		3.04546	2.05767	2.69844
kre62Δ/Δ		2.22538	3.22048	2.86673		5.61556	6.5242	5.3306		19.3932	21.4312	18.8414		0.120696	0.138695	0.11666		3.49302	3.30737	4.42587
skn2Δ/Δ		4.16821	4.59395	4.84604		7.80228	8.2517	6.88015		26.4105	26.6342	27.3709		0.184588	0.195563	0.185565		3.86955	3.92854	4.23108
kre6/skn1Δ/Δ		1.53154	0.803735	1.46278		11.0094	9.70974	12.1209		21.5398	18.6263	18.4391		0.26767	0.309739	0.26955		2.49882	2.1909	1.90644
kre6/kre62/skn2/skn1Δ/Δ		0	0	0		13.5477	9.87373	9.39672		12.7529	18.8146	14.8306		0.13236	0.146168	0.112764		2.92926	1.47319	1.45313
kre6/kre62/skn2/skn1Δ/Δ+ PACT1-KRE6		7.31649	7.93235	8.4787		7.07687	6.75111	6.01647		31.1176	31.9744	28.8399		0.203296	0.192539	0.20204		2.21376	1.69984	1.84987

## Sheet: Panel c
		% cell wall polymers in SDS-beta-ME fraction / total cell wall
		β-glucan				mannan				chitin				protein
WT		0	0	0		7.98695	7.58728	8.06885		0	0	0		11.1972	13.1918	19.538
PMRP1-CHS1/chs1Δ		0	0	0.559269		2.76771	4.4434	2.27995		0	0	0		25.6499	23.5773	16.5939
chs2Δ/Δ		0	0.537443	0		6.60786	5.33216	10.0529		0	0	0		13.9055	8.63858	31.6609
chs3Δ/Δ		0	0.657614	0		6.67885	8.0509	8.65584		0	0	0		18.9406	11.424	24.283
fks1Δ		0.956183	0	1.42733		9.35278	9.41052	6.7368		0	0	0		30.4329	26.7546	15.2062
WT (pH 7.5)		0.406725	2.00277	1.05757		8.2971	10.1848	6.59832		0	0.052645	0		18.3051	24.6577	19.6382
phr1Δ/Δ		0	1.71233	1.27327		9.00181	11.009	9.58355		0	0.0501655	0		10.1978	20.804	24.6236
WT (pH 5.5)		0	0.998975	1.21111		7.73721	6.1821	8.33858		0	0	0		14.1894	25.8176	22.214
phr2Δ/Δ		0	1.21743	0.467151		7.25052	7.36708	2.25255		0	0.117515	0		22.4367	14.9438	9.02817
och1Δ/Δ		0.964623	1.84973	1.4272		0.5082	1.03548	0.953155		0.0533458	0.0325172	0.0283223		2.86586	6.85582	8.7509
mnn9Δ/Δ		0.773874	0	1.51062		0.957406	1.6573	0.895202		0	0.0617491	0.0905852		8.06343	11.5419	15.0642
mnn2/22/21/23/24/26Δ/Δ		0.312011	0	0.826436		0.58603	1.38097	0.902964		0.00689521	0.0295929	0.0385294		4.92735	12.4991	12.655
mnt1/mnt2Δ/Δ		0.293736	0	2.26286		7.36724	8.17088	4.95591		0	0	0		10.1362	17.3359	14.0819
cwh41Δ/Δ		0.374024	0	0.817206		3.92909	4.81637	2.62912		0	0	0.0147527		15.5228	32.8627	22.9695
rot2Δ/Δ		0.642445	0	1.2042		1.75553	2.82257	2.47929		0.0151711	0.030025	0.178488		9.48693	12.6296	9.94655
kre5Δ/Δ		0	0	0.481506		2.67741	2.4797	1.89395		0.0803247	0.0841022	0.0664404		6.6982	6.22205	8.55052
kre1Δ/Δ		0	0	0.452573		5.9375	7.91968	6.58336		0.0682898	0	0		6.62262	19.1156	16.8438
kre6Δ/Δ		0.629915	1.52568	0.74956		3.20671	2.47633	2.81115		0.17918	0.201253	0.129509		2.15613	6.28329	4.2237
skn1Δ/Δ		0.680928	0	0.684554		9.21275	9.88891	8.12965		0	0	0		21.921	17.9645	21.8049
kre62Δ/Δ		0.208325	0.281954	0.21077		8.66155	8.74118	7.81343		0	0	0		26.8401	21.6414	31.1358
skn2Δ/Δ		0.344436	0.458985	0.232784		6.78832	6.13243	7.35113		0	0	0		4.74751	6.02353	5.44963
kre6/skn1Δ/Δ		0.798474	0.486599	0.643721		3.21108	3.23596	2.44484		0.0829788	0.0933215	0.0445095		6.63332	5.46312	4.9717
kre6/kre62/skn2/skn1Δ/Δ		0.578881	0.890699	0		2.13519	3.39942	5.20361		0.209057	0	0		3.10711	7.02087	6.72382
kre6/kre62/skn2/skn1Δ/Δ+ PACT1-KRE6		0.161422	0	0		6.0062	5.73585	5.83199		0	0	0		5.35676	5.26524	8.03396
