# Supplementary material for: β-1,6-Glucan plays a central role in the structure and remodeling of the bilaminate fungal cell wall
Source: eLife. 2024 Dec 5;13:RP100569. doi: 10.7554/eLife.100569 (PMC11620752; doi:10.7554/eLife.100569)
Supplement: Figure 3—figure supplement 2—source data 1. [file elife-100569-fig3-figsupp2-data1.xlsx]

## Sheet: Panel a
% of branching point of B-1,6-glucan
WT	PMRP1-CHS1/chs1Δ	chs2Δ/Δ	chs3Δ/Δ	fks1Δ	WT (pH 7.5)	phr1Δ/Δ	WT (pH 5.5)	phr2Δ/Δ	och1Δ/Δ	mnn9Δ/Δ	mnn2/22/21/23/24/26Δ/Δ	mnt1/mnt2Δ/Δ	cwh41Δ/Δ	rot2Δ/Δ	kre5Δ/Δ	kre1Δ/Δ	kre6Δ/Δ	skn1Δ/Δ	kre62Δ/Δ	skn2Δ/Δ	kre6/skn1Δ/Δ	kre6/kre62/skn2/skn1Δ/Δ	kre6/kre62/skn2/skn1Δ/Δ+ PACT1-KRE6
5.2582	5.46508	5.09011	4.37034	6.13744	5.46077	5.2151	5.69782	3.50403	5.61162	5.26682	3.78849	8.43467	4.89616	2.59893	1.3792	6.64171	10.2714	5.53401	6.09865	5.39181	10.7603	0	4.53843
5.02977	4.77117	4.50395	4.34448	6.04693	7.17184	5.63748	4.82289	4.15484	5.99952	5.55128	5.45646	8.10711	4.80565	2.25413	1.16801	5.96935	8.75361	6.19347	6.40897	5.45215	9.26219	0	4.32724
5.64179	5.6461	5.57283	5.18493	5.73661	6.83135	5.40905	5.02115	4.31	5.49956	4.68066	4.63756	9.27943	5.56421	2.43084	1.21111	8.13297	7.95626	6.08572	5.65041	5.63317	8.96049	0	4.11174

## Sheet: Panel b
% of branching point of B-1,3-glucan
WT	PMRP1-CHS1/chs1Δ	chs2Δ/Δ	chs3Δ/Δ	fks1Δ	WT (pH 7.5)	phr1Δ/Δ	WT (pH 5.5)	phr2Δ/Δ	och1Δ/Δ	mnn9Δ/Δ	mnn2/22/21/23/24/26Δ/Δ	mnt1/mnt2Δ/Δ	cwh41Δ/Δ	rot2Δ/Δ	kre5Δ/Δ	kre1Δ/Δ	kre6Δ/Δ	skn1Δ/Δ	kre62Δ/Δ	skn2Δ/Δ	kre6/skn1Δ/Δ	kre6/kre62/skn2/skn1Δ/Δ	kre6/kre62/skn2/skn1Δ/Δ+ PACT1-KRE6
3.98	5.51	4.15	4.77	4.07	5.79	1.77	6.4	4.2	8.16	7.28	6.76	5.81	5.26	12.31	8.68	4.74	7.03	2.1997	3.56	3.61	8.7711	9.52	3.37
4.34	4.7	4.1	4.48	4.06	4.67	1.76	4.85	3.62	8.07	7.46	7.02	5.58	5.61	12.13	8.99	4.58	7	4.23	3.69	3.49	7.91	9.98	3.4
4.1	5.46	4.65	4.47	4.02	4.33	1.33	4.84	3.32	8.27	6.85	6.18	4.84	4.89	10.61	7.83	4.24	7.8332	4.04	3.77	3.86	7.44	9.13	3.35
