# Supplementary material for: β-1,6-Glucan plays a central role in the structure and remodeling of the bilaminate fungal cell wall
Source: eLife. 2024 Dec 5;13:RP100569. doi: 10.7554/eLife.100569 (PMC11620752; doi:10.7554/eLife.100569)
Supplement: Figure 3—source data 1. [file elife-100569-fig3-data1.xlsx]

## Sheet: Panels a, d, g
	% B-1,6-glucan / total cell wall
	AI fraction				AS fraction
WT	12.2026	14.6863	10.8563		4.17801	4.18238	3.9376
PMRP1-CHS1/chs1Δ	16.6249	19.4648	20.3871		5.34465	4.1592	5.28428
chs2Δ/Δ	14.1584	19.9669	10.9401		4.28559	3.47312	2.51543
chs3Δ/Δ	9.52907	10.4588	10.2634		6.02392	8.93782	4.86355
fks1Δ	9.53748	10.2078	13.6368		2.16637	2.13333	2.88109
WT (pH 7.5)	15.9451	15.9282	16.7418		4.23036	2.593	3.49732
phr1Δ/Δ	16.6515	13.2661	17.2895		2.97359	1.68246	1.6381
WT (pH 5.5)	14.1382	12.8832	18.1194		4.3584	4.08117	2.55516
phr2Δ/Δ	4.78467	6.40663	7.30701		1.85757	1.45464	1.98623
och1Δ/Δ	40.6018	38.6652	41.8657		5.75474	4.66423	4.08355
mnn9Δ/Δ	29.6198	30.1961	30.4148		6.28935	6.17752	5.37749
mnn2/22/21/23/24/26Δ/Δ	35.7211	28.1289	27.1056		5.89743	4.12041	6.03352
mnt1/mnt2Δ/Δ	10.5278	12.5947	11.9691		3.78979	2.7449	3.57621
cwh41Δ/Δ	16.069	14.777	17.111		6.51191	4.34257	7.12528
rot2Δ/Δ	5.20608	3.79792	4.29059		0.965561	0.67268	0.743469
kre5Δ/Δ	2.80186	2.38372	3.08875		0.384941	0.150856	0.438014
kre1Δ/Δ	10.3038	8.36975	9.54052		4.37579	3.40975	3.6035
kre6Δ/Δ	7.19918	6.57381	8.83069		1.68468	1.28084	1.06118
skn1Δ/Δ	13.5751	12.8918	12.969		3.35706	3.24872	2.7898
kre62Δ/Δ	9.57685	10.7681	9.08981		2.22538	3.22048	2.86673
skn2Δ/Δ	12.0886	11.8823	11.9226		4.16821	4.59395	4.84604
kre6/skn1Δ/Δ	7.24353	6.66674	7.06143		1.53154	0.803735	1.46278
kre6/kre62/skn2/skn1Δ/Δ	0	0	0		0	0	0
kre6/kre62/skn2/skn1Δ/Δ+ PACT1-KRE6	16.1063	16.8173	14.8071		7.31649	7.93235	8.4787

## Sheet: Panels b, e, h
B-1,6-glucan mean MW (kDa)
WT	PMRP1-CHS1/chs1Δ	chs2Δ/Δ	chs3Δ/Δ	fks1Δ	WT (pH 7.5)	phr1Δ/Δ	WT (pH 5.5)	phr2Δ/Δ	och1Δ/Δ	mnn9Δ/Δ	mnn2/22/21/23/24/26Δ/Δ	mnt1/mnt2Δ/Δ	cwh41Δ/Δ	rot2Δ/Δ	kre5Δ/Δ	kre1Δ/Δ	kre6Δ/Δ	skn1Δ/Δ	kre62Δ/Δ	skn2Δ/Δ	kre6/skn1Δ/Δ	kre6/kre62/skn2/skn1Δ/Δ	kre6/kre62/skn2/skn1Δ/Δ+ PACT1-KRE6
41.6161	59.8618	56.6882	40.839	47.5341	47.3155	63.5085	40.2217	32.6976	63.8836	63.0934	49.4703	20.2185	43.9807	21.1566	18.4059	23.4519	15.074	47.4429	38.6471	42.8553	22.4503	0	44.9108
46.4573	41.7855	47.5158	38.5087	47.4976	46.3326	61.0574	45.2107	34.0975	59.3886	51.5638	46.9986	15.2697	41.3157	14.0555	11.1538	16.7953	21.7363	47.3458	38.6569	40.779	23.3396	0	43.7449
39.7178	56.6452	41.9302	41.7936	46.1846	46.3534	69.3106	46.2971	34.7918	59.4495	59.2823	55.9748	18.6855	41.8043	13.2137	15.5695	19.4531	26.4555	47.2338	38.7188	43.9188	26.469	0	43.8542

## Sheet: Panels c, f, i
% of branching point of B-1,6-glucan
WT	PMRP1-CHS1/chs1Δ	chs2Δ/Δ	chs3Δ/Δ	fks1Δ	WT (pH 7.5)	phr1Δ/Δ	WT (pH 5.5)	phr2Δ/Δ	och1Δ/Δ	mnn9Δ/Δ	mnn2/22/21/23/24/26Δ/Δ	mnt1/mnt2Δ/Δ	cwh41Δ/Δ	rot2Δ/Δ	kre5Δ/Δ	kre1Δ/Δ	kre6Δ/Δ	skn1Δ/Δ	kre62Δ/Δ	skn2Δ/Δ	kre6/skn1Δ/Δ	kre6/kre62/skn2/skn1Δ/Δ	kre6/kre62/skn2/skn1Δ/Δ+ PACT1-KRE6
5.2582	5.46508	5.09011	4.37034	6.13744	5.46077	5.2151	5.69782	3.50403	5.61162	5.26682	3.78849	8.43467	4.89616	2.59893	1.3792	6.64171	10.2714	5.53401	6.09865	5.39181	10.7603	0	4.53843
5.02977	4.77117	4.50395	4.34448	6.04693	7.17184	5.63748	4.82289	4.15484	5.99952	5.55128	5.45646	8.10711	4.80565	2.25413	1.16801	5.96935	8.75361	6.19347	6.40897	5.45215	9.26219	0	4.32724
5.64179	5.6461	5.57283	5.18493	5.73661	6.83135	5.40905	5.02115	4.31	5.49956	4.68066	4.63756	9.27943	5.56421	2.43084	1.21111	8.13297	7.95626	6.08572	5.65041	5.63317	8.96049	0	4.11174
