# Supplementary material for: β-1,6-Glucan plays a central role in the structure and remodeling of the bilaminate fungal cell wall
Source: eLife. 2024 Dec 5;13:RP100569. doi: 10.7554/eLife.100569 (PMC11620752; doi:10.7554/eLife.100569)
Supplement: Figure 4—source data 1. [file elife-100569-fig4-data1.xlsx]

## Sheet: Panel a
	WT			kre6Δ/Δ			kre62Δ/Δ			skn1Δ/Δ			skn2Δ/Δ			kre6/skn1Δ/Δ			kre6/kre62/skn2/skn1Δ/Δ			kre6/kre62/skn2/skn1Δ/Δ+ PACT1-KRE6
Hours	OD 620 nm
0	0.085	0.08	0.088	0.081	0.079	0.085	0.082	0.081	0.081	0.081	0.087	0.082	0.082	0.085	0.082	0.08	0.08	0.084	0.085	0.08	0.085	0.087	0.083	0.081
0.166944	0.084	0.08	0.09	0.082	0.081	0.087	0.082	0.081	0.081	0.081	0.084	0.082	0.081	0.083	0.082	0.081	0.08	0.086	0.088	0.08	0.085	0.085	0.082	0.081
0.333611	0.087	0.082	0.091	0.083	0.08	0.087	0.083	0.081	0.083	0.084	0.084	0.083	0.085	0.084	0.082	0.082	0.081	0.084	0.089	0.08	0.085	0.089	0.082	0.082
0.500278	0.085	0.082	0.086	0.083	0.08	0.09	0.083	0.08	0.085	0.082	0.083	0.085	0.083	0.085	0.085	0.082	0.081	0.084	0.093	0.08	0.086	0.086	0.083	0.084
0.666944	0.086	0.083	0.093	0.085	0.08	0.089	0.084	0.082	0.085	0.082	0.084	0.084	0.083	0.084	0.085	0.084	0.081	0.085	0.089	0.082	0.09	0.087	0.083	0.084
0.833611	0.085	0.082	0.091	0.084	0.081	0.086	0.082	0.081	0.086	0.087	0.082	0.085	0.089	0.082	0.086	0.083	0.082	0.085	0.09	0.083	0.089	0.092	0.082	0.084
1.00028	0.087	0.082	0.089	0.085	0.08	0.086	0.083	0.081	0.089	0.081	0.083	0.09	0.082	0.084	0.088	0.082	0.082	0.085	0.091	0.082	0.095	0.087	0.083	0.085
1.16694	0.087	0.083	0.088	0.083	0.08	0.086	0.083	0.081	0.087	0.083	0.084	0.086	0.084	0.083	0.087	0.082	0.081	0.086	0.089	0.083	0.092	0.09	0.083	0.084
1.33361	0.085	0.083	0.091	0.085	0.081	0.093	0.084	0.083	0.089	0.082	0.085	0.089	0.083	0.084	0.089	0.082	0.082	0.086	0.092	0.083	0.088	0.089	0.083	0.085
1.50028	0.085	0.083	0.087	0.084	0.081	0.087	0.084	0.084	0.089	0.082	0.087	0.088	0.084	0.086	0.089	0.082	0.082	0.086	0.091	0.083	0.096	0.087	0.084	0.085
1.66694	0.086	0.082	0.089	0.084	0.08	0.091	0.085	0.084	0.088	0.083	0.088	0.089	0.084	0.086	0.088	0.082	0.082	0.086	0.095	0.083	0.092	0.088	0.084	0.087
1.83361	0.089	0.083	0.092	0.088	0.081	0.094	0.085	0.084	0.091	0.085	0.087	0.088	0.083	0.085	0.091	0.083	0.082	0.086	0.093	0.083	0.09	0.088	0.083	0.087
2.00028	0.085	0.083	0.091	0.085	0.081	0.092	0.083	0.083	0.089	0.085	0.087	0.089	0.085	0.086	0.088	0.082	0.083	0.085	0.092	0.083	0.089	0.089	0.084	0.088
2.16694	0.086	0.082	0.09	0.085	0.081	0.088	0.085	0.082	0.088	0.085	0.086	0.086	0.085	0.086	0.088	0.082	0.083	0.088	0.093	0.083	0.092	0.089	0.084	0.086
2.33361	0.086	0.082	0.092	0.086	0.081	0.092	0.084	0.084	0.093	0.084	0.086	0.088	0.084	0.085	0.091	0.083	0.082	0.087	0.095	0.082	0.089	0.089	0.084	0.088
2.50028	0.086	0.082	0.094	0.086	0.084	0.092	0.086	0.082	0.091	0.084	0.089	0.088	0.087	0.088	0.09	0.083	0.083	0.087	0.089	0.085	0.088	0.09	0.085	0.087
2.66694	0.086	0.083	0.095	0.085	0.083	0.092	0.087	0.083	0.091	0.085	0.085	0.089	0.084	0.085	0.09	0.086	0.083	0.091	0.089	0.084	0.089	0.09	0.084	0.088
2.83361	0.087	0.083	0.093	0.085	0.082	0.093	0.087	0.082	0.091	0.086	0.085	0.088	0.084	0.086	0.09	0.086	0.082	0.09	0.091	0.083	0.089	0.091	0.085	0.088
3.00028	0.088	0.082	0.1	0.085	0.082	0.097	0.087	0.082	0.101	0.085	0.085	0.092	0.084	0.085	0.103	0.085	0.083	0.09	0.093	0.085	0.089	0.09	0.084	0.091
3.16694	0.089	0.082	0.095	0.085	0.081	0.094	0.086	0.082	0.093	0.084	0.091	0.088	0.088	0.09	0.093	0.085	0.082	0.09	0.092	0.083	0.091	0.09	0.087	0.086
3.33361	0.087	0.082	0.102	0.085	0.081	0.098	0.087	0.083	0.093	0.087	0.089	0.094	0.086	0.088	0.096	0.085	0.084	0.091	0.091	0.084	0.09	0.096	0.086	0.092
3.50028	0.088	0.083	0.098	0.085	0.082	0.098	0.087	0.084	0.094	0.087	0.087	0.089	0.085	0.087	0.094	0.084	0.084	0.091	0.09	0.084	0.09	0.096	0.087	0.087
3.66694	0.089	0.083	0.102	0.087	0.083	0.1	0.088	0.083	0.095	0.089	0.086	0.091	0.09	0.087	0.098	0.086	0.086	0.091	0.093	0.085	0.092	0.093	0.087	0.088
3.83361	0.089	0.083	0.1	0.087	0.082	0.1	0.089	0.084	0.092	0.085	0.086	0.095	0.084	0.087	0.092	0.088	0.085	0.092	0.091	0.085	0.089	0.091	0.087	0.091
4.00028	0.089	0.083	0.106	0.087	0.083	0.101	0.089	0.086	0.095	0.086	0.085	0.109	0.086	0.087	0.096	0.087	0.086	0.092	0.092	0.084	0.09	0.092	0.086	0.101
4.16694	0.09	0.084	0.103	0.087	0.083	0.105	0.09	0.085	0.093	0.085	0.089	0.106	0.085	0.089	0.094	0.087	0.085	0.094	0.091	0.085	0.09	0.091	0.087	0.1
4.33361	0.091	0.084	0.11	0.086	0.083	0.099	0.088	0.086	0.097	0.087	0.088	0.11	0.088	0.088	0.1	0.086	0.086	0.091	0.092	0.084	0.092	0.094	0.086	0.096
4.50028	0.094	0.086	0.102	0.088	0.084	0.103	0.089	0.086	0.094	0.085	0.089	0.095	0.088	0.089	0.095	0.087	0.085	0.095	0.093	0.085	0.091	0.091	0.086	0.091
4.66694	0.091	0.086	0.099	0.087	0.085	0.104	0.089	0.088	0.095	0.087	0.09	0.093	0.088	0.09	0.095	0.087	0.085	0.096	0.091	0.085	0.092	0.092	0.086	0.089
4.83361	0.092	0.087	0.102	0.088	0.084	0.103	0.09	0.088	0.094	0.087	0.088	0.093	0.089	0.089	0.093	0.088	0.087	0.096	0.093	0.084	0.089	0.093	0.087	0.09
5.00028	0.091	0.086	0.106	0.088	0.085	0.103	0.091	0.088	0.1	0.089	0.09	0.104	0.094	0.091	0.103	0.089	0.088	0.095	0.092	0.085	0.093	0.094	0.088	0.099
5.16694	0.095	0.088	0.103	0.088	0.085	0.101	0.091	0.089	0.097	0.093	0.091	0.098	0.093	0.091	0.098	0.088	0.087	0.096	0.095	0.084	0.092	0.093	0.087	0.093
5.33361	0.095	0.087	0.109	0.091	0.087	0.104	0.094	0.089	0.099	0.088	0.09	0.103	0.088	0.091	0.102	0.09	0.089	0.099	0.096	0.086	0.092	0.096	0.088	0.096
5.50028	0.095	0.088	0.109	0.088	0.084	0.102	0.09	0.091	0.097	0.092	0.094	0.099	0.092	0.094	0.098	0.086	0.088	0.099	0.093	0.083	0.091	0.094	0.088	0.094
5.66694	0.096	0.09	0.106	0.09	0.084	0.103	0.093	0.09	0.099	0.095	0.093	0.097	0.095	0.093	0.098	0.09	0.088	0.101	0.092	0.082	0.091	0.092	0.088	0.093
5.83361	0.102	0.09	0.107	0.09	0.085	0.1	0.093	0.091	0.104	0.093	0.095	0.106	0.093	0.096	0.105	0.089	0.089	0.098	0.093	0.083	0.096	0.094	0.088	0.098
6.00028	0.096	0.09	0.11	0.091	0.087	0.1	0.094	0.092	0.101	0.097	0.095	0.101	0.097	0.095	0.101	0.091	0.089	0.1	0.093	0.083	0.092	0.096	0.089	0.096
6.16694	0.102	0.09	0.11	0.092	0.087	0.102	0.095	0.091	0.101	0.095	0.095	0.1	0.094	0.096	0.1	0.091	0.091	0.103	0.093	0.083	0.091	0.098	0.088	0.094
6.33361	0.099	0.092	0.114	0.093	0.088	0.101	0.097	0.093	0.103	0.096	0.098	0.103	0.095	0.098	0.103	0.093	0.091	0.103	0.095	0.084	0.091	0.096	0.089	0.096
6.50028	0.103	0.093	0.111	0.093	0.09	0.103	0.097	0.094	0.103	0.098	0.099	0.1	0.097	0.099	0.1	0.092	0.092	0.103	0.094	0.084	0.091	0.096	0.089	0.094
6.66694	0.099	0.094	0.114	0.093	0.09	0.102	0.097	0.095	0.106	0.101	0.099	0.106	0.101	0.1	0.105	0.091	0.091	0.104	0.093	0.084	0.093	0.1	0.09	0.098
6.83361	0.101	0.094	0.114	0.094	0.089	0.105	0.1	0.096	0.107	0.102	0.102	0.104	0.101	0.102	0.104	0.094	0.093	0.106	0.094	0.083	0.092	0.098	0.09	0.094
7.00028	0.105	0.096	0.117	0.097	0.09	0.105	0.101	0.096	0.109	0.103	0.1	0.105	0.103	0.102	0.105	0.096	0.093	0.107	0.092	0.083	0.092	0.099	0.091	0.095
7.16694	0.106	0.097	0.118	0.094	0.091	0.109	0.1	0.1	0.11	0.104	0.103	0.107	0.104	0.106	0.106	0.094	0.094	0.111	0.094	0.083	0.093	0.101	0.092	0.095
7.33361	0.109	0.099	0.125	0.098	0.096	0.109	0.104	0.099	0.111	0.104	0.103	0.109	0.103	0.106	0.108	0.097	0.096	0.11	0.093	0.085	0.092	0.098	0.091	0.096
7.50028	0.108	0.102	0.13	0.097	0.093	0.108	0.106	0.103	0.113	0.108	0.107	0.112	0.107	0.109	0.11	0.097	0.096	0.111	0.094	0.084	0.093	0.102	0.092	0.098
7.66694	0.111	0.101	0.133	0.097	0.092	0.112	0.108	0.104	0.113	0.11	0.105	0.111	0.108	0.11	0.11	0.099	0.095	0.112	0.096	0.084	0.09	0.102	0.093	0.097
7.83361	0.113	0.105	0.13	0.1	0.094	0.111	0.112	0.107	0.118	0.11	0.109	0.116	0.108	0.113	0.113	0.1	0.096	0.111	0.094	0.083	0.093	0.101	0.093	0.098
8.00028	0.117	0.106	0.138	0.1	0.096	0.113	0.113	0.11	0.121	0.116	0.113	0.121	0.114	0.116	0.118	0.1	0.1	0.115	0.093	0.084	0.093	0.102	0.094	0.101
8.16694	0.123	0.109	0.142	0.104	0.097	0.114	0.118	0.112	0.122	0.119	0.112	0.122	0.117	0.117	0.119	0.106	0.099	0.112	0.095	0.084	0.092	0.104	0.094	0.1
8.33361	0.123	0.112	0.152	0.102	0.097	0.118	0.119	0.113	0.124	0.121	0.114	0.126	0.119	0.12	0.122	0.1	0.102	0.116	0.094	0.084	0.091	0.104	0.097	0.101
8.50028	0.124	0.114	0.153	0.101	0.099	0.12	0.119	0.118	0.129	0.125	0.12	0.128	0.122	0.124	0.123	0.1	0.103	0.117	0.096	0.083	0.092	0.107	0.096	0.101
8.66694	0.131	0.117	0.152	0.102	0.1	0.117	0.125	0.122	0.13	0.125	0.12	0.13	0.122	0.126	0.126	0.103	0.104	0.113	0.094	0.084	0.093	0.103	0.095	0.101
8.83361	0.135	0.118	0.159	0.104	0.103	0.12	0.129	0.123	0.132	0.133	0.12	0.135	0.132	0.126	0.129	0.104	0.106	0.115	0.096	0.084	0.091	0.107	0.096	0.103
9.00028	0.138	0.127	0.156	0.104	0.101	0.122	0.13	0.131	0.138	0.136	0.13	0.139	0.134	0.134	0.132	0.104	0.106	0.116	0.093	0.085	0.093	0.106	0.097	0.101
9.16694	0.143	0.129	0.162	0.107	0.103	0.123	0.136	0.134	0.148	0.141	0.131	0.149	0.137	0.137	0.141	0.108	0.107	0.119	0.093	0.085	0.095	0.109	0.099	0.106
9.33361	0.148	0.136	0.16	0.108	0.105	0.124	0.143	0.137	0.149	0.146	0.136	0.153	0.141	0.139	0.144	0.107	0.11	0.119	0.095	0.085	0.097	0.109	0.098	0.105
9.50028	0.154	0.137	0.176	0.108	0.104	0.126	0.145	0.14	0.149	0.153	0.142	0.154	0.148	0.146	0.147	0.108	0.11	0.119	0.094	0.084	0.094	0.111	0.101	0.108
9.66694	0.157	0.143	0.176	0.11	0.107	0.133	0.148	0.145	0.153	0.155	0.146	0.156	0.15	0.153	0.148	0.108	0.116	0.125	0.098	0.085	0.092	0.11	0.101	0.105
9.83361	0.163	0.145	0.184	0.111	0.106	0.133	0.152	0.148	0.156	0.163	0.15	0.162	0.157	0.156	0.151	0.107	0.117	0.125	0.097	0.085	0.092	0.112	0.101	0.107
10.0003	0.17	0.151	0.193	0.115	0.106	0.135	0.161	0.152	0.162	0.173	0.152	0.17	0.163	0.159	0.16	0.11	0.113	0.124	0.094	0.085	0.092	0.112	0.102	0.11
10.1669	0.181	0.16	0.205	0.114	0.112	0.134	0.169	0.162	0.166	0.184	0.16	0.173	0.176	0.17	0.162	0.112	0.118	0.123	0.097	0.085	0.091	0.114	0.103	0.109
10.3336	0.189	0.166	0.208	0.115	0.11	0.145	0.172	0.17	0.175	0.194	0.169	0.181	0.184	0.177	0.171	0.111	0.12	0.128	0.093	0.085	0.095	0.116	0.104	0.112
10.5003	0.199	0.176	0.216	0.119	0.111	0.139	0.187	0.181	0.182	0.201	0.176	0.19	0.191	0.185	0.173	0.118	0.12	0.127	0.096	0.085	0.092	0.117	0.107	0.11
10.6669	0.207	0.181	0.229	0.118	0.112	0.145	0.196	0.186	0.195	0.215	0.184	0.208	0.202	0.193	0.187	0.117	0.124	0.132	0.097	0.084	0.093	0.12	0.105	0.115
10.8336	0.218	0.196	0.232	0.118	0.114	0.14	0.205	0.197	0.204	0.229	0.194	0.215	0.215	0.209	0.197	0.116	0.127	0.133	0.099	0.085	0.096	0.119	0.107	0.116
11.0003	0.23	0.206	0.251	0.12	0.118	0.155	0.217	0.203	0.21	0.243	0.205	0.217	0.229	0.219	0.204	0.122	0.129	0.134	0.096	0.086	0.095	0.122	0.11	0.12
11.1669	0.243	0.214	0.262	0.121	0.121	0.154	0.227	0.219	0.219	0.261	0.214	0.232	0.242	0.229	0.212	0.121	0.13	0.138	0.094	0.085	0.094	0.125	0.11	0.12
11.3336	0.256	0.233	0.282	0.127	0.125	0.154	0.239	0.233	0.227	0.28	0.229	0.242	0.26	0.248	0.22	0.125	0.137	0.138	0.093	0.085	0.095	0.125	0.113	0.119
11.5003	0.274	0.246	0.298	0.127	0.125	0.156	0.251	0.247	0.236	0.3	0.242	0.256	0.275	0.261	0.231	0.123	0.137	0.143	0.095	0.086	0.095	0.131	0.114	0.122
11.6669	0.289	0.262	0.319	0.127	0.129	0.156	0.266	0.261	0.249	0.318	0.259	0.272	0.299	0.279	0.245	0.126	0.139	0.144	0.097	0.086	0.097	0.13	0.116	0.128
11.8336	0.312	0.28	0.337	0.131	0.128	0.162	0.283	0.283	0.262	0.336	0.27	0.282	0.317	0.295	0.257	0.129	0.144	0.143	0.096	0.086	0.096	0.135	0.12	0.124
12.0003	0.33	0.297	0.359	0.134	0.131	0.161	0.3	0.301	0.279	0.355	0.29	0.304	0.331	0.315	0.265	0.13	0.147	0.148	0.096	0.086	0.095	0.136	0.119	0.124
12.1669	0.358	0.334	0.383	0.135	0.138	0.162	0.326	0.333	0.298	0.377	0.312	0.324	0.345	0.341	0.285	0.136	0.155	0.147	0.096	0.086	0.097	0.134	0.119	0.126
12.3336	0.383	0.355	0.403	0.135	0.141	0.161	0.345	0.358	0.32	0.406	0.339	0.346	0.376	0.365	0.3	0.136	0.152	0.151	0.094	0.087	0.097	0.137	0.122	0.128
12.5003	0.403	0.369	0.415	0.139	0.145	0.165	0.375	0.361	0.345	0.435	0.354	0.376	0.402	0.369	0.332	0.14	0.157	0.154	0.095	0.086	0.095	0.141	0.127	0.133
12.6669	0.438	0.399	0.431	0.138	0.143	0.174	0.401	0.398	0.363	0.458	0.376	0.394	0.421	0.414	0.348	0.139	0.163	0.155	0.101	0.086	0.097	0.144	0.128	0.133
12.8336	0.464	0.411	0.452	0.142	0.15	0.167	0.428	0.409	0.392	0.494	0.393	0.413	0.455	0.407	0.377	0.146	0.163	0.16	0.1	0.086	0.096	0.153	0.131	0.138
13.0003	0.493	0.436	0.48	0.143	0.156	0.176	0.45	0.427	0.414	0.523	0.407	0.439	0.481	0.429	0.401	0.143	0.176	0.166	0.096	0.086	0.095	0.154	0.132	0.137
13.1669	0.525	0.458	0.518	0.147	0.155	0.184	0.477	0.451	0.419	0.553	0.438	0.439	0.511	0.453	0.402	0.147	0.179	0.165	0.096	0.085	0.096	0.151	0.135	0.144
13.3336	0.551	0.479	0.532	0.154	0.164	0.19	0.504	0.478	0.447	0.577	0.461	0.469	0.537	0.484	0.421	0.15	0.191	0.165	0.096	0.086	0.097	0.162	0.138	0.144
13.5003	0.584	0.502	0.565	0.154	0.174	0.192	0.533	0.497	0.463	0.612	0.48	0.483	0.57	0.499	0.44	0.152	0.197	0.165	0.099	0.085	0.096	0.161	0.141	0.149
13.6669	0.607	0.537	0.593	0.166	0.174	0.195	0.558	0.528	0.489	0.637	0.507	0.506	0.599	0.537	0.457	0.154	0.214	0.175	0.095	0.085	0.096	0.17	0.145	0.154
13.8336	0.64	0.565	0.619	0.17	0.175	0.208	0.591	0.557	0.527	0.677	0.542	0.557	0.633	0.567	0.501	0.159	0.208	0.177	0.098	0.087	0.094	0.174	0.149	0.155
14.0003	0.676	0.591	0.647	0.175	0.178	0.204	0.625	0.579	0.547	0.706	0.56	0.574	0.665	0.586	0.519	0.164	0.218	0.182	0.097	0.088	0.098	0.173	0.15	0.162
14.1669	0.704	0.614	0.673	0.185	0.183	0.206	0.641	0.606	0.561	0.733	0.591	0.6	0.692	0.615	0.534	0.167	0.214	0.182	0.095	0.088	0.099	0.179	0.153	0.164
14.3336	0.73	0.645	0.695	0.185	0.198	0.21	0.675	0.625	0.588	0.76	0.61	0.626	0.725	0.642	0.565	0.176	0.219	0.192	0.095	0.086	0.097	0.175	0.16	0.172
14.5003	0.759	0.664	0.716	0.185	0.207	0.21	0.702	0.656	0.614	0.791	0.632	0.643	0.748	0.665	0.582	0.177	0.207	0.197	0.099	0.086	0.095	0.187	0.16	0.165
14.6669	0.79	0.698	0.742	0.192	0.209	0.212	0.736	0.68	0.644	0.817	0.664	0.681	0.78	0.683	0.62	0.185	0.226	0.197	0.096	0.087	0.096	0.189	0.167	0.177
14.8336	0.818	0.717	0.76	0.198	0.209	0.212	0.764	0.702	0.668	0.843	0.683	0.705	0.802	0.703	0.648	0.186	0.23	0.205	0.1	0.089	0.094	0.194	0.173	0.178
15.0003	0.838	0.739	0.793	0.2	0.216	0.226	0.782	0.735	0.697	0.863	0.708	0.721	0.83	0.764	0.668	0.197	0.22	0.211	0.096	0.086	0.096	0.2	0.176	0.18
15.1669	0.868	0.757	0.812	0.203	0.216	0.229	0.81	0.756	0.722	0.89	0.737	0.739	0.854	0.755	0.694	0.199	0.235	0.207	0.097	0.09	0.094	0.201	0.178	0.179
15.3336	0.885	0.786	0.831	0.206	0.214	0.229	0.83	0.78	0.746	0.913	0.754	0.771	0.876	0.773	0.723	0.198	0.25	0.211	0.097	0.093	0.097	0.209	0.18	0.185
15.5003	0.917	0.804	0.857	0.21	0.218	0.238	0.858	0.799	0.774	0.93	0.779	0.786	0.904	0.806	0.744	0.198	0.248	0.222	0.097	0.092	0.1	0.22	0.184	0.191
15.6669	0.935	0.827	0.876	0.214	0.22	0.235	0.881	0.819	0.791	0.952	0.8	0.808	0.923	0.834	0.758	0.205	0.259	0.215	0.1	0.089	0.098	0.221	0.191	0.193
15.8336	0.953	0.85	0.898	0.219	0.232	0.246	0.9	0.841	0.82	0.966	0.822	0.828	0.96	0.899	0.787	0.217	0.258	0.229	0.096	0.087	0.1	0.228	0.189	0.2
16.0003	0.978	0.869	0.908	0.222	0.238	0.239	0.918	0.877	0.831	0.988	0.845	0.844	0.958	0.926	0.808	0.216	0.262	0.227	0.097	0.088	0.099	0.234	0.195	0.202
16.1669	0.998	0.889	0.93	0.23	0.238	0.248	0.941	0.875	0.854	1.002	0.856	0.862	1.019	0.898	0.828	0.223	0.266	0.234	0.099	0.089	0.099	0.237	0.203	0.207
16.3336	1.017	0.903	0.941	0.238	0.238	0.247	0.957	0.897	0.869	1.009	0.879	0.881	1.046	0.954	0.845	0.227	0.261	0.226	0.101	0.086	0.101	0.255	0.208	0.214
16.5003	1.03	0.925	0.956	0.241	0.242	0.253	0.979	0.91	0.885	1.025	0.891	0.901	1.078	0.972	0.864	0.23	0.262	0.235	0.099	0.086	0.097	0.258	0.212	0.218
16.6669	1.053	0.937	0.983	0.242	0.249	0.27	0.996	0.928	0.917	1.042	0.906	0.915	1.075	0.949	0.88	0.232	0.276	0.246	0.1	0.091	0.097	0.264	0.217	0.216
16.8336	1.066	0.958	0.999	0.246	0.251	0.279	1.01	0.95	0.935	1.06	0.925	0.979	1.037	0.965	1	0.237	0.282	0.262	0.1	0.089	0.099	0.271	0.226	0.227
17.0003	1.081	0.97	0.998	0.254	0.254	0.27	1.024	0.96	0.939	1.074	0.936	1.04	1.049	0.994	1.023	0.242	0.289	0.247	0.101	0.089	0.1	0.276	0.231	0.236
17.1669	1.096	0.991	1.022	0.257	0.261	0.281	1.038	0.977	0.966	1.084	0.952	1.046	1.066	0.987	1.042	0.251	0.289	0.263	0.099	0.088	0.099	0.282	0.235	0.243
17.3336	1.114	0.999	1.039	0.264	0.269	0.293	1.054	0.989	0.985	1.086	0.967	1.06	1.076	0.999	1.066	0.257	0.294	0.278	0.099	0.096	0.102	0.29	0.242	0.247
17.5003	1.124	1.021	1.042	0.267	0.27	0.283	1.068	1.005	0.996	1.103	0.981	0.983	1.089	1.018	1.074	0.262	0.303	0.285	0.1	0.094	0.101	0.302	0.244	0.25
17.6669	1.138	1.04	1.053	0.273	0.274	0.286	1.086	1.027	1.007	1.107	0.999	0.993	1.099	1.033	1.081	0.273	0.323	0.295	0.1	0.091	0.101	0.31	0.25	0.261
17.8336	1.151	1.055	1.067	0.283	0.283	0.296	1.097	1.042	1.02	1.118	1.006	1.005	1.11	1.044	1.087	0.276	0.319	0.29	0.1	0.095	0.099	0.318	0.258	0.261
18.0003	1.16	1.059	1.078	0.287	0.281	0.298	1.113	1.051	1.033	1.137	1.018	1.031	1.121	1.053	1.089	0.281	0.307	0.296	0.1	0.098	0.103	0.325	0.266	0.269
18.1669	1.17	1.078	1.104	0.291	0.284	0.319	1.121	1.07	1.033	1.149	1.044	1.131	1.133	1.072	1.125	0.282	0.345	0.315	0.099	0.093	0.104	0.339	0.275	0.287
18.3336	1.181	1.088	1.101	0.293	0.289	0.313	1.139	1.08	1.058	1.155	1.052	1.131	1.137	1.081	1.134	0.29	0.351	0.314	0.101	0.096	0.101	0.349	0.279	0.287
18.5003	1.186	1.104	1.115	0.302	0.301	0.329	1.145	1.097	1.062	1.164	1.07	1.136	1.151	1.093	1.145	0.295	0.36	0.3	0.1	0.092	0.102	0.369	0.291	0.294
18.6669	1.194	1.108	1.125	0.306	0.305	0.314	1.156	1.102	1.075	1.17	1.075	1.054	1.168	1.104	1.143	0.303	0.371	0.315	0.101	0.092	0.103	0.38	0.296	0.303
18.8336	1.201	1.129	1.144	0.311	0.313	0.344	1.169	1.117	1.092	1.177	1.089	1.142	1.177	1.117	1.143	0.312	0.369	0.349	0.101	0.092	0.101	0.4	0.306	0.31
19.0003	1.21	1.136	1.157	0.321	0.31	0.337	1.173	1.128	1.103	1.187	1.096	1.161	1.188	1.128	1.16	0.312	0.36	0.344	0.103	0.093	0.103	0.413	0.316	0.328
19.1669	1.217	1.143	1.167	0.327	0.318	0.366	1.186	1.134	1.117	1.197	1.103	1.114	1.196	1.139	1.156	0.324	0.389	0.357	0.099	0.098	0.104	0.424	0.332	0.34
19.3336	1.223	1.157	1.176	0.332	0.325	0.334	1.197	1.151	1.126	1.202	1.112	1.182	1.199	1.143	1.15	0.33	0.386	0.359	0.102	0.099	0.103	0.438	0.342	0.352
19.5003	1.228	1.166	1.19	0.337	0.33	0.368	1.201	1.163	1.14	1.206	1.127	1.114	1.214	1.157	1.098	0.333	0.386	0.357	0.101	0.099	0.102	0.459	0.356	0.363
19.6669	1.235	1.178	1.192	0.349	0.341	0.365	1.209	1.17	1.158	1.22	1.133	1.122	1.226	1.169	1.119	0.351	0.398	0.376	0.102	0.098	0.104	0.471	0.375	0.374
19.8336	1.24	1.184	1.194	0.358	0.344	0.382	1.214	1.182	1.17	1.223	1.145	1.129	1.228	1.169	1.135	0.36	0.415	0.395	0.103	0.098	0.102	0.49	0.376	0.392
20.0003	1.242	1.194	1.192	0.37	0.358	0.381	1.223	1.189	1.175	1.232	1.151	1.138	1.24	1.175	1.146	0.368	0.41	0.403	0.102	0.102	0.104	0.506	0.397	0.405
20.1669	1.238	1.193	1.183	0.368	0.363	0.377	1.228	1.195	1.186	1.243	1.16	1.152	1.248	1.183	1.159	0.377	0.422	0.413	0.104	0.1	0.104	0.522	0.417	0.422
20.3336	1.24	1.181	1.181	0.374	0.367	0.384	1.226	1.199	1.186	1.247	1.168	1.162	1.251	1.188	1.172	0.382	0.429	0.425	0.103	0.096	0.102	0.535	0.434	0.436
20.5003	1.242	1.185	1.182	0.382	0.372	0.387	1.233	1.202	1.192	1.241	1.173	1.169	1.255	1.183	1.18	0.389	0.447	0.437	0.108	0.101	0.106	0.556	0.443	0.442
20.6667	1.238	1.184	1.184	0.394	0.373	0.413	1.234	1.202	1.209	1.238	1.174	1.178	1.254	1.182	1.196	0.4	0.448	0.449	0.107	0.097	0.106	0.569	0.463	0.463
20.8336	1.233	1.174	1.182	0.399	0.389	0.398	1.232	1.201	1.197	1.249	1.171	1.181	1.255	1.188	1.191	0.409	0.458	0.451	0.104	0.099	0.105	0.598	0.47	0.472
21.0003	1.232	1.18	1.185	0.401	0.391	0.414	1.231	1.198	1.194	1.248	1.17	1.183	1.256	1.189	1.209	0.417	0.464	0.469	0.107	0.103	0.103	0.603	0.483	0.48
21.1669	1.235	1.179	1.189	0.42	0.401	0.433	1.23	1.2	1.195	1.247	1.176	1.184	1.248	1.193	1.197	0.43	0.478	0.478	0.108	0.1	0.104	0.625	0.505	0.493
21.3336	1.232	1.181	1.196	0.423	0.41	0.454	1.229	1.199	1.188	1.255	1.172	1.167	1.257	1.186	1.199	0.438	0.492	0.486	0.106	0.103	0.103	0.644	0.509	0.514
21.5003	1.234	1.183	1.197	0.436	0.425	0.449	1.225	1.203	1.19	1.247	1.176	1.169	1.252	1.192	1.2	0.45	0.503	0.495	0.107	0.106	0.102	0.665	0.52	0.518
21.6669	1.236	1.178	1.198	0.444	0.422	0.458	1.23	1.191	1.18	1.251	1.174	1.192	1.247	1.189	1.193	0.458	0.507	0.502	0.107	0.098	0.103	0.681	0.547	0.531
21.8336	1.236	1.179	1.201	0.456	0.434	0.486	1.228	1.195	1.192	1.238	1.174	1.19	1.25	1.193	1.216	0.468	0.526	0.518	0.106	0.101	0.11	0.703	0.558	0.558
22.0003	1.238	1.168	1.202	0.46	0.448	0.487	1.229	1.198	1.182	1.247	1.174	1.178	1.251	1.192	1.198	0.478	0.534	0.527	0.107	0.101	0.104	0.718	0.567	0.567
22.1669	1.238	1.172	1.204	0.469	0.464	0.508	1.229	1.196	1.196	1.252	1.184	1.198	1.244	1.201	1.214	0.492	0.541	0.541	0.108	0.097	0.112	0.746	0.585	0.583
22.3336	1.234	1.182	1.207	0.475	0.466	0.506	1.229	1.192	1.186	1.249	1.19	1.191	1.247	1.198	1.199	0.501	0.547	0.552	0.109	0.097	0.105	0.763	0.606	0.594
22.5003	1.237	1.177	1.207	0.488	0.47	0.511	1.229	1.195	1.187	1.257	1.19	1.194	1.251	1.196	1.201	0.511	0.568	0.562	0.106	0.103	0.105	0.78	0.617	0.608
22.6669	1.237	1.181	1.209	0.501	0.488	0.537	1.23	1.19	1.198	1.257	1.19	1.175	1.25	1.197	1.189	0.524	0.581	0.578	0.106	0.103	0.115	0.803	0.635	0.63
22.8336	1.237	1.185	1.207	0.504	0.498	0.545	1.23	1.185	1.198	1.26	1.192	1.182	1.255	1.199	1.206	0.532	0.577	0.593	0.109	0.104	0.112	0.836	0.65	0.659
23.0003	1.237	1.176	1.207	0.526	0.507	0.545	1.236	1.194	1.187	1.249	1.188	1.185	1.257	1.199	1.202	0.545	0.598	0.605	0.106	0.101	0.115	0.842	0.671	0.664
23.1669	1.237	1.184	1.21	0.529	0.524	0.555	1.228	1.182	1.196	1.244	1.183	1.189	1.252	1.196	1.203	0.549	0.608	0.618	0.109	0.109	0.113	0.867	0.697	0.684
23.3336	1.234	1.176	1.209	0.546	0.523	0.564	1.23	1.191	1.202	1.262	1.185	1.188	1.248	1.198	1.196	0.568	0.618	0.627	0.109	0.111	0.103	0.881	0.713	0.701
23.5003	1.238	1.186	1.213	0.554	0.539	0.579	1.229	1.193	1.207	1.252	1.186	1.188	1.241	1.194	1.2	0.576	0.625	0.637	0.109	0.107	0.107	0.906	0.735	0.728
23.6669	1.234	1.188	1.211	0.569	0.553	0.594	1.228	1.195	1.208	1.251	1.192	1.199	1.254	1.194	1.211	0.588	0.648	0.652	0.107	0.104	0.106	0.921	0.755	0.75
23.8336	1.23	1.188	1.212	0.574	0.554	0.603	1.231	1.186	1.209	1.265	1.178	1.196	1.254	1.185	1.209	0.61	0.676	0.661	0.111	0.11	0.108	0.939	0.766	0.764
24.0003	1.239	1.189	1.213	0.595	0.569	0.616	1.228	1.192	1.214	1.252	1.192	1.203	1.26	1.191	1.213	0.625	0.677	0.677	0.109	0.11	0.109	0.961	0.792	0.784
24.1669	1.235	1.19	1.214	0.609	0.583	0.634	1.237	1.194	1.213	1.257	1.193	1.207	1.254	1.195	1.21	0.645	0.683	0.694	0.11	0.114	0.106	0.975	0.801	0.802
24.3336	1.239	1.19	1.217	0.61	0.599	0.644	1.235	1.196	1.214	1.264	1.194	1.209	1.248	1.198	1.214	0.644	0.698	0.703	0.111	0.113	0.115	0.993	0.827	0.826
24.5003	1.238	1.189	1.21	0.618	0.609	0.655	1.235	1.197	1.216	1.263	1.195	1.211	1.257	1.195	1.215	0.663	0.71	0.71	0.113	0.11	0.102	1.009	0.841	0.837
24.6669	1.239	1.189	1.213	0.637	0.615	0.665	1.238	1.194	1.215	1.267	1.194	1.219	1.257	1.194	1.22	0.674	0.723	0.714	0.111	0.117	0.113	1.021	0.859	0.856
24.8336	1.238	1.185	1.216	0.649	0.633	0.671	1.239	1.195	1.22	1.267	1.196	1.221	1.256	1.19	1.221	0.687	0.73	0.722	0.111	0.108	0.109	1.029	0.874	0.876
25.0003	1.237	1.185	1.217	0.657	0.638	0.691	1.241	1.192	1.218	1.268	1.201	1.225	1.26	1.187	1.223	0.697	0.748	0.732	0.113	0.112	0.116	1.041	0.894	0.891
25.1669	1.236	1.188	1.217	0.672	0.656	0.694	1.24	1.201	1.219	1.271	1.206	1.23	1.262	1.198	1.222	0.715	0.752	0.745	0.115	0.112	0.117	1.05	0.913	0.907
25.3336	1.237	1.191	1.218	0.681	0.667	0.702	1.24	1.204	1.225	1.27	1.207	1.227	1.259	1.2	1.226	0.715	0.755	0.754	0.111	0.111	0.11	1.063	0.936	0.927
25.5003	1.235	1.19	1.219	0.686	0.68	0.71	1.239	1.204	1.225	1.269	1.2	1.227	1.259	1.196	1.228	0.721	0.762	0.778	0.114	0.103	0.12	1.077	0.943	0.943
25.6669	1.229	1.19	1.22	0.695	0.691	0.728	1.24	1.199	1.226	1.264	1.205	1.23	1.267	1.194	1.228	0.731	0.783	0.785	0.115	0.114	0.111	1.101	0.962	0.958
25.8336	1.231	1.194	1.22	0.713	0.707	0.727	1.236	1.207	1.225	1.267	1.207	1.227	1.266	1.202	1.227	0.754	0.791	0.794	0.113	0.113	0.106	1.104	0.976	0.972
26.0003	1.236	1.192	1.214	0.71	0.698	0.741	1.239	1.205	1.226	1.266	1.202	1.23	1.269	1.196	1.229	0.759	0.794	0.795	0.118	0.13	0.103	1.114	0.988	0.989
26.1669	1.236	1.193	1.213	0.718	0.718	0.747	1.238	1.206	1.227	1.268	1.207	1.231	1.269	1.2	1.231	0.769	0.828	0.82	0.115	0.114	0.116	1.129	1.007	1.004
26.3336	1.236	1.193	1.215	0.733	0.73	0.754	1.241	1.207	1.227	1.27	1.21	1.232	1.27	1.204	1.23	0.775	0.826	0.829	0.118	0.124	0.11	1.142	1.016	1.017
26.5003	1.238	1.193	1.215	0.735	0.739	0.764	1.24	1.208	1.229	1.271	1.21	1.233	1.274	1.204	1.235	0.787	0.836	0.824	0.118	0.13	0.108	1.151	1.028	1.035
26.6669	1.236	1.197	1.218	0.759	0.757	0.771	1.244	1.209	1.232	1.27	1.216	1.236	1.27	1.207	1.232	0.795	0.845	0.83	0.12	0.106	0.108	1.164	1.044	1.048
26.8336	1.239	1.192	1.215	0.762	0.759	0.78	1.237	1.207	1.232	1.271	1.212	1.237	1.267	1.202	1.235	0.803	0.85	0.828	0.117	0.126	0.107	1.173	1.05	1.058
27.0003	1.234	1.196	1.215	0.774	0.77	0.783	1.24	1.208	1.233	1.278	1.213	1.238	1.265	1.208	1.235	0.825	0.848	0.839	0.119	0.112	0.111	1.18	1.062	1.068
27.1669	1.233	1.195	1.218	0.788	0.767	0.808	1.241	1.208	1.234	1.275	1.214	1.238	1.27	1.207	1.235	0.83	0.854	0.853	0.122	0.137	0.099	1.177	1.069	1.077
27.3336	1.235	1.196	1.216	0.793	0.779	0.811	1.247	1.208	1.234	1.275	1.212	1.243	1.271	1.205	1.236	0.841	0.864	0.862	0.123	0.128	0.104	1.186	1.08	1.087
27.5003	1.235	1.197	1.216	0.795	0.795	0.822	1.241	1.214	1.235	1.278	1.216	1.243	1.273	1.212	1.237	0.841	0.871	0.868	0.126	0.13	0.105	1.188	1.085	1.093
27.6669	1.235	1.19	1.216	0.797	0.793	0.827	1.244	1.211	1.235	1.274	1.212	1.244	1.27	1.208	1.237	0.852	0.873	0.874	0.122	0.144	0.107	1.192	1.101	1.098
27.8336	1.237	1.189	1.214	0.811	0.805	0.832	1.244	1.211	1.235	1.28	1.212	1.243	1.275	1.21	1.236	0.852	0.881	0.87	0.124	0.138	0.111	1.201	1.103	1.102
28.0003	1.235	1.193	1.222	0.829	0.81	0.836	1.248	1.211	1.236	1.285	1.211	1.245	1.277	1.207	1.239	0.866	0.88	0.881	0.126	0.142	0.104	1.212	1.109	1.101
28.1669	1.234	1.193	1.219	0.84	0.826	0.84	1.246	1.212	1.236	1.278	1.212	1.246	1.283	1.207	1.238	0.866	0.878	0.893	0.128	0.12	0.106	1.213	1.117	1.11
28.3336	1.233	1.19	1.225	0.854	0.834	0.848	1.249	1.208	1.238	1.287	1.212	1.245	1.28	1.206	1.238	0.876	0.884	0.891	0.13	0.112	0.105	1.219	1.125	1.12
28.5003	1.234	1.192	1.223	0.858	0.827	0.849	1.249	1.209	1.239	1.282	1.209	1.247	1.283	1.205	1.242	0.885	0.928	0.902	0.13	0.147	0.104	1.225	1.128	1.13
28.6669	1.231	1.196	1.222	0.868	0.852	0.856	1.25	1.211	1.239	1.288	1.212	1.25	1.282	1.209	1.243	0.891	0.942	0.905	0.135	0.143	0.104	1.235	1.131	1.138
28.8336	1.234	1.192	1.223	0.864	0.858	0.861	1.251	1.207	1.239	1.287	1.212	1.25	1.282	1.208	1.241	0.9	0.952	0.904	0.135	0.139	0.111	1.241	1.133	1.144
29.0003	1.234	1.194	1.226	0.872	0.874	0.864	1.251	1.209	1.241	1.285	1.212	1.248	1.286	1.21	1.242	0.905	0.958	0.963	0.137	0.13	0.108	1.246	1.143	1.151
29.1669	1.232	1.193	1.225	0.877	0.884	0.867	1.252	1.209	1.24	1.291	1.216	1.248	1.287	1.209	1.242	0.911	0.971	0.972	0.141	0.15	0.106	1.252	1.15	1.156
29.3336	1.234	1.194	1.223	0.883	0.895	0.874	1.251	1.208	1.24	1.287	1.217	1.246	1.278	1.208	1.242	0.917	0.976	0.98	0.142	0.179	0.107	1.257	1.157	1.162
29.5003	1.233	1.194	1.222	0.887	0.894	0.877	1.252	1.206	1.241	1.291	1.215	1.248	1.281	1.207	1.241	0.923	0.98	0.982	0.144	0.132	0.107	1.263	1.165	1.171
29.6667	1.232	1.19	1.222	0.896	0.897	0.881	1.252	1.204	1.239	1.295	1.212	1.242	1.28	1.205	1.24	0.933	0.982	0.982	0.145	0.133	0.106	1.269	1.173	1.179
29.8336	1.23	1.193	1.223	0.9	0.906	0.888	1.252	1.207	1.239	1.29	1.214	1.24	1.287	1.209	1.242	0.936	0.988	0.986	0.15	0.15	0.108	1.273	1.18	1.185
30.0003	1.231	1.191	1.223	0.906	0.912	0.892	1.247	1.206	1.24	1.294	1.211	1.24	1.287	1.204	1.241	0.942	0.986	0.993	0.15	0.128	0.107	1.276	1.188	1.192
30.1669	1.232	1.193	1.223	0.911	0.915	0.898	1.25	1.204	1.239	1.29	1.213	1.241	1.282	1.202	1.242	0.984	0.987	0.996	0.152	0.113	0.11	1.281	1.197	1.198
30.3336	1.233	1.195	1.224	0.913	0.923	0.95	1.251	1.208	1.239	1.299	1.214	1.244	1.287	1.206	1.243	0.993	1.012	1	0.151	0.141	0.115	1.282	1.202	1.203
30.5003	1.228	1.196	1.223	0.928	0.931	0.949	1.249	1.207	1.238	1.291	1.214	1.242	1.285	1.206	1.244	1.005	1.014	1.042	0.156	0.151	0.11	1.282	1.208	1.209
30.6669	1.232	1.194	1.222	0.932	0.933	0.961	1.247	1.207	1.241	1.299	1.216	1.243	1.283	1.208	1.242	1.011	1.02	1.047	0.161	0.155	0.114	1.283	1.215	1.213
30.8336	1.232	1.193	1.223	0.938	0.942	0.968	1.248	1.205	1.24	1.293	1.212	1.245	1.287	1.205	1.241	1.017	1.019	1.055	0.161	0.132	0.117	1.28	1.222	1.218
31.0003	1.231	1.194	1.222	0.94	0.952	0.976	1.248	1.206	1.239	1.293	1.216	1.243	1.286	1.208	1.24	1.022	1.026	1.061	0.163	0.17	0.118	1.278	1.224	1.223
31.1669	1.232	1.196	1.222	0.977	0.962	0.974	1.25	1.208	1.237	1.295	1.218	1.243	1.286	1.21	1.241	1.051	1.036	1.061	0.166	0.162	0.119	1.277	1.228	1.226
31.3336	1.232	1.189	1.222	0.984	0.993	1.021	1.25	1.202	1.236	1.298	1.211	1.242	1.288	1.205	1.242	1.053	1.04	1.066	0.17	0.135	0.12	1.277	1.226	1.227
31.5003	1.23	1.191	1.221	0.986	0.999	1.033	1.25	1.201	1.233	1.298	1.215	1.244	1.285	1.207	1.242	1.058	1.079	1.071	0.173	0.132	0.118	1.278	1.228	1.228
31.6669	1.231	1.194	1.221	0.995	1.008	1.036	1.251	1.201	1.237	1.296	1.216	1.246	1.284	1.209	1.241	1.067	1.094	1.081	0.175	0.161	0.123	1.276	1.226	1.227
31.8336	1.23	1.189	1.22	1.006	1.018	1.04	1.252	1.201	1.236	1.298	1.212	1.24	1.288	1.205	1.243	1.067	1.095	1.087	0.184	0.137	0.121	1.277	1.225	1.225
32.0003	1.231	1.192	1.221	1.011	1.022	1.046	1.251	1.204	1.237	1.298	1.215	1.244	1.287	1.205	1.242	1.074	1.105	1.095	0.183	0.134	0.124	1.278	1.226	1.223
32.1669	1.23	1.187	1.222	1.014	1.025	1.051	1.252	1.205	1.235	1.3	1.216	1.245	1.287	1.205	1.243	1.079	1.104	1.099	0.184	0.142	0.126	1.276	1.225	1.224
32.3336	1.229	1.185	1.223	1.021	1.031	1.054	1.251	1.205	1.237	1.298	1.217	1.243	1.288	1.205	1.242	1.091	1.109	1.104	0.187	0.151	0.125	1.275	1.222	1.223
32.5003	1.231	1.19	1.223	1.028	1.039	1.059	1.252	1.202	1.233	1.299	1.215	1.244	1.288	1.204	1.244	1.09	1.104	1.106	0.193	0.126	0.129	1.275	1.223	1.223
32.6669	1.23	1.185	1.221	1.031	1.06	1.06	1.253	1.201	1.235	1.3	1.212	1.243	1.29	1.202	1.241	1.097	1.106	1.108	0.194	0.15	0.126	1.276	1.22	1.222
32.8336	1.229	1.188	1.223	1.038	1.062	1.065	1.255	1.204	1.237	1.303	1.21	1.245	1.291	1.2	1.242	1.103	1.106	1.11	0.205	0.123	0.13	1.277	1.22	1.222
33.0003	1.228	1.189	1.224	1.046	1.067	1.068	1.254	1.206	1.238	1.302	1.213	1.246	1.294	1.204	1.241	1.11	1.105	1.108	0.211	0.175	0.135	1.277	1.218	1.221
33.1669	1.232	1.19	1.222	1.045	1.071	1.076	1.253	1.206	1.237	1.302	1.214	1.245	1.291	1.207	1.241	1.109	1.11	1.111	0.206	0.161	0.134	1.276	1.218	1.22
33.3336	1.229	1.186	1.226	1.046	1.081	1.076	1.251	1.206	1.237	1.305	1.215	1.246	1.293	1.21	1.24	1.108	1.14	1.109	0.212	0.135	0.135	1.278	1.217	1.221
33.5003	1.228	1.191	1.222	1.055	1.087	1.086	1.253	1.208	1.238	1.303	1.216	1.244	1.292	1.21	1.241	1.121	1.14	1.112	0.218	0.136	0.136	1.277	1.215	1.22
33.6669	1.231	1.186	1.223	1.098	1.088	1.088	1.254	1.209	1.239	1.305	1.215	1.247	1.292	1.208	1.242	1.127	1.141	1.112	0.225	0.17	0.138	1.277	1.217	1.221
33.8336	1.231	1.188	1.224	1.098	1.09	1.093	1.254	1.207	1.238	1.304	1.213	1.249	1.291	1.208	1.242	1.126	1.144	1.113	0.222	0.143	0.143	1.276	1.215	1.221
34.0003	1.232	1.186	1.224	1.105	1.089	1.088	1.252	1.208	1.241	1.305	1.216	1.252	1.293	1.208	1.242	1.131	1.144	1.112	0.225	0.158	0.141	1.277	1.216	1.219
34.1669	1.231	1.188	1.223	1.11	1.098	1.091	1.253	1.209	1.238	1.307	1.219	1.251	1.294	1.21	1.243	1.131	1.147	1.12	0.226	0.157	0.148	1.279	1.216	1.219
34.3336	1.234	1.188	1.227	1.111	1.098	1.094	1.256	1.208	1.242	1.305	1.218	1.252	1.294	1.209	1.243	1.139	1.146	1.117	0.226	0.144	0.151	1.279	1.214	1.217
34.5003	1.233	1.189	1.228	1.116	1.1	1.094	1.253	1.209	1.244	1.307	1.217	1.253	1.294	1.211	1.245	1.138	1.151	1.119	0.235	0.155	0.151	1.278	1.216	1.221
34.6669	1.232	1.187	1.228	1.12	1.098	1.091	1.257	1.209	1.244	1.309	1.215	1.254	1.297	1.21	1.245	1.146	1.15	1.12	0.239	0.172	0.156	1.281	1.213	1.22
34.8336	1.231	1.178	1.229	1.126	1.091	1.089	1.258	1.21	1.241	1.308	1.215	1.253	1.297	1.209	1.245	1.146	1.145	1.122	0.231	0.141	0.15	1.279	1.214	1.22
35.0003	1.233	1.18	1.23	1.132	1.102	1.09	1.257	1.212	1.241	1.308	1.22	1.254	1.297	1.211	1.246	1.149	1.153	1.123	0.242	0.154	0.154	1.28	1.215	1.221
35.1669	1.232	1.185	1.231	1.135	1.097	1.09	1.257	1.208	1.241	1.311	1.215	1.254	1.298	1.209	1.247	1.153	1.148	1.127	0.251	0.137	0.157	1.28	1.215	1.222
35.3336	1.234	1.188	1.232	1.135	1.1	1.091	1.255	1.212	1.244	1.311	1.219	1.256	1.298	1.211	1.25	1.152	1.156	1.123	0.243	0.147	0.166	1.279	1.216	1.221
35.5003	1.232	1.186	1.231	1.146	1.102	1.093	1.26	1.212	1.245	1.311	1.215	1.257	1.3	1.212	1.247	1.157	1.156	1.126	0.251	0.163	0.16	1.281	1.215	1.22
35.6669	1.234	1.183	1.232	1.143	1.104	1.092	1.259	1.213	1.248	1.314	1.217	1.257	1.302	1.213	1.248	1.159	1.16	1.164	0.256	0.155	0.155	1.282	1.217	1.224
35.8336	1.234	1.183	1.232	1.166	1.099	1.092	1.257	1.215	1.247	1.314	1.217	1.258	1.3	1.215	1.25	1.156	1.16	1.166	0.257	0.191	0.161	1.28	1.218	1.221
36.0003	1.235	1.186	1.227	1.165	1.103	1.09	1.259	1.215	1.246	1.314	1.214	1.26	1.3	1.214	1.249	1.157	1.16	1.168	0.264	0.163	0.165	1.28	1.216	1.222
36.1669	1.237	1.188	1.236	1.167	1.106	1.096	1.257	1.213	1.248	1.315	1.216	1.259	1.301	1.214	1.248	1.156	1.161	1.17	0.276	0.156	0.166	1.28	1.216	1.221
36.3336	1.238	1.187	1.237	1.171	1.105	1.095	1.259	1.214	1.246	1.313	1.224	1.26	1.301	1.215	1.25	1.16	1.163	1.166	0.274	0.174	0.163	1.279	1.215	1.222
36.5003	1.236	1.188	1.238	1.169	1.105	1.097	1.26	1.217	1.249	1.317	1.221	1.261	1.303	1.216	1.251	1.158	1.163	1.169	0.272	0.175	0.169	1.279	1.218	1.222
36.6669	1.236	1.188	1.239	1.172	1.107	1.097	1.262	1.216	1.249	1.317	1.223	1.261	1.305	1.216	1.252	1.162	1.164	1.171	0.288	0.15	0.17	1.282	1.215	1.222
36.8336	1.237	1.189	1.234	1.174	1.106	1.095	1.263	1.219	1.25	1.32	1.224	1.261	1.307	1.217	1.252	1.158	1.163	1.17	0.285	0.155	0.166	1.283	1.217	1.221
37.0003	1.236	1.19	1.241	1.172	1.111	1.092	1.263	1.218	1.25	1.318	1.227	1.262	1.305	1.219	1.255	1.16	1.161	1.171	0.298	0.18	0.17	1.283	1.217	1.222
37.1669	1.239	1.192	1.239	1.17	1.109	1.097	1.261	1.218	1.249	1.318	1.226	1.264	1.305	1.219	1.255	1.157	1.16	1.175	0.304	0.183	0.167	1.283	1.218	1.222
37.3336	1.237	1.195	1.242	1.173	1.111	1.095	1.262	1.22	1.254	1.321	1.227	1.266	1.308	1.221	1.255	1.159	1.162	1.175	0.278	0.173	0.163	1.284	1.216	1.223
37.5003	1.238	1.191	1.241	1.178	1.111	1.094	1.264	1.221	1.253	1.321	1.227	1.266	1.308	1.22	1.257	1.164	1.164	1.172	0.295	0.175	0.171	1.284	1.219	1.223
37.6669	1.241	1.193	1.243	1.171	1.113	1.098	1.263	1.221	1.255	1.321	1.229	1.266	1.309	1.221	1.256	1.164	1.167	1.173	0.291	0.199	0.169	1.285	1.218	1.224
37.8336	1.239	1.193	1.245	1.177	1.111	1.097	1.266	1.222	1.256	1.323	1.23	1.267	1.312	1.223	1.259	1.163	1.168	1.172	0.291	0.175	0.19	1.287	1.22	1.223
38.0003	1.242	1.191	1.244	1.173	1.117	1.097	1.264	1.223	1.255	1.323	1.232	1.269	1.31	1.224	1.259	1.194	1.168	1.173	0.312	0.224	0.186	1.286	1.217	1.223
38.1669	1.239	1.195	1.246	1.179	1.114	1.096	1.267	1.225	1.259	1.325	1.233	1.27	1.313	1.224	1.261	1.196	1.163	1.172	0.322	0.228	0.183	1.288	1.221	1.225
38.3336	1.241	1.195	1.246	1.182	1.115	1.1	1.268	1.228	1.259	1.324	1.234	1.272	1.313	1.229	1.264	1.198	1.166	1.173	0.335	0.241	0.186	1.288	1.221	1.226
38.5003	1.239	1.193	1.248	1.176	1.114	1.099	1.266	1.226	1.262	1.328	1.232	1.271	1.315	1.227	1.264	1.197	1.167	1.174	0.32	0.22	0.163	1.289	1.22	1.225
38.6669	1.239	1.195	1.249	1.175	1.113	1.094	1.265	1.227	1.259	1.326	1.234	1.271	1.313	1.229	1.265	1.193	1.168	1.173	0.327	0.221	0.173	1.288	1.221	1.227
38.8336	1.24	1.198	1.249	1.179	1.114	1.1	1.268	1.228	1.259	1.327	1.237	1.274	1.314	1.23	1.266	1.195	1.17	1.173	0.333	0.267	0.165	1.291	1.22	1.227
39.0003	1.241	1.197	1.249	1.18	1.116	1.101	1.267	1.229	1.263	1.33	1.237	1.273	1.315	1.231	1.269	1.194	1.173	1.174	0.345	0.233	0.17	1.293	1.22	1.228
39.1669	1.243	1.2	1.248	1.174	1.116	1.1	1.269	1.229	1.263	1.33	1.238	1.276	1.317	1.231	1.268	1.189	1.171	1.173	0.357	0.268	0.179	1.293	1.22	1.228
39.3336	1.242	1.201	1.25	1.18	1.117	1.097	1.269	1.231	1.264	1.331	1.239	1.276	1.319	1.233	1.271	1.191	1.169	1.171	0.372	0.31	0.18	1.293	1.22	1.229
39.5003	1.242	1.202	1.251	1.182	1.114	1.099	1.274	1.232	1.265	1.334	1.241	1.278	1.32	1.233	1.271	1.196	1.171	1.17	0.382	0.307	0.175	1.298	1.221	1.229
39.6669	1.245	1.202	1.254	1.176	1.12	1.101	1.27	1.232	1.264	1.33	1.242	1.277	1.319	1.235	1.273	1.192	1.169	1.17	0.39	0.318	0.188	1.295	1.221	1.228
39.8336	1.246	1.203	1.255	1.174	1.125	1.099	1.271	1.231	1.267	1.336	1.239	1.278	1.321	1.231	1.275	1.187	1.169	1.168	0.396	0.303	0.173	1.295	1.224	1.229
40.0003	1.244	1.206	1.254	1.177	1.12	1.101	1.273	1.235	1.266	1.335	1.244	1.281	1.323	1.237	1.274	1.219	1.174	1.171	0.404	0.315	0.165	1.299	1.223	1.229
40.1669	1.246	1.207	1.253	1.176	1.119	1.105	1.271	1.236	1.268	1.334	1.246	1.281	1.319	1.237	1.276	1.218	1.17	1.169	0.418	0.313	0.17	1.298	1.225	1.231
40.3336	1.243	1.204	1.255	1.178	1.122	1.105	1.275	1.235	1.271	1.337	1.246	1.282	1.323	1.238	1.277	1.221	1.173	1.168	0.423	0.316	0.167	1.298	1.222	1.231
40.5003	1.247	1.21	1.256	1.176	1.122	1.105	1.276	1.237	1.27	1.338	1.245	1.283	1.328	1.239	1.277	1.222	1.169	1.169	0.439	0.304	0.174	1.299	1.226	1.232
40.6669	1.248	1.207	1.258	1.176	1.12	1.107	1.274	1.238	1.271	1.339	1.246	1.285	1.323	1.241	1.28	1.219	1.172	1.174	0.466	0.315	0.183	1.299	1.225	1.233
40.8336	1.249	1.208	1.259	1.177	1.124	1.107	1.274	1.237	1.272	1.339	1.248	1.284	1.323	1.242	1.28	1.216	1.171	1.172	0.483	0.32	0.176	1.3	1.222	1.233
41.0003	1.248	1.21	1.261	1.178	1.124	1.108	1.277	1.238	1.273	1.341	1.247	1.285	1.327	1.241	1.281	1.222	1.173	1.17	0.499	0.308	0.187	1.302	1.223	1.235
41.1669	1.248	1.212	1.261	1.176	1.124	1.104	1.278	1.239	1.273	1.341	1.249	1.285	1.328	1.242	1.281	1.22	1.174	1.169	0.506	0.336	0.2	1.303	1.224	1.234
41.3336	1.248	1.212	1.262	1.176	1.125	1.105	1.277	1.233	1.275	1.34	1.249	1.287	1.328	1.243	1.283	1.223	1.174	1.172	0.523	0.324	0.193	1.304	1.225	1.234
41.5003	1.249	1.213	1.261	1.173	1.124	1.105	1.276	1.24	1.274	1.342	1.25	1.289	1.328	1.245	1.284	1.218	1.177	1.172	0.537	0.348	0.198	1.303	1.228	1.235
41.6669	1.246	1.212	1.261	1.178	1.127	1.104	1.277	1.242	1.277	1.343	1.254	1.29	1.33	1.246	1.286	1.217	1.175	1.172	0.552	0.346	0.206	1.305	1.226	1.238
41.8336	1.244	1.212	1.264	1.178	1.123	1.104	1.28	1.242	1.278	1.344	1.253	1.29	1.33	1.247	1.286	1.219	1.178	1.169	0.561	0.352	0.19	1.305	1.228	1.237
42.0003	1.246	1.212	1.263	1.176	1.125	1.107	1.279	1.244	1.278	1.345	1.256	1.291	1.331	1.25	1.286	1.217	1.175	1.173	0.568	0.365	0.217	1.306	1.226	1.237
42.1669	1.243	1.216	1.265	1.177	1.127	1.104	1.28	1.243	1.279	1.346	1.255	1.293	1.335	1.248	1.289	1.217	1.18	1.174	0.582	0.378	0.2	1.308	1.227	1.237
42.3336	1.245	1.217	1.265	1.178	1.128	1.107	1.278	1.245	1.28	1.345	1.256	1.294	1.331	1.248	1.29	1.216	1.181	1.172	0.586	0.388	0.217	1.307	1.226	1.239
42.5003	1.243	1.217	1.266	1.178	1.128	1.108	1.284	1.247	1.282	1.347	1.259	1.292	1.333	1.251	1.289	1.217	1.178	1.174	0.599	0.383	0.223	1.308	1.23	1.239
42.6669	1.242	1.218	1.266	1.178	1.132	1.105	1.284	1.246	1.281	1.35	1.259	1.294	1.338	1.251	1.292	1.214	1.179	1.173	0.609	0.389	0.232	1.31	1.23	1.24
42.8336	1.245	1.217	1.269	1.18	1.133	1.152	1.288	1.249	1.283	1.348	1.261	1.288	1.337	1.254	1.293	1.218	1.178	1.173	0.622	0.402	0.251	1.309	1.232	1.239
43.0003	1.241	1.219	1.27	1.176	1.13	1.152	1.284	1.248	1.285	1.351	1.261	1.296	1.336	1.254	1.294	1.216	1.179	1.172	0.63	0.387	0.255	1.31	1.231	1.242
43.1669	1.24	1.219	1.271	1.179	1.134	1.157	1.287	1.251	1.285	1.352	1.263	1.298	1.339	1.255	1.294	1.216	1.18	1.177	0.646	0.402	0.276	1.31	1.233	1.241
43.3336	1.242	1.22	1.271	1.175	1.131	1.154	1.288	1.252	1.286	1.354	1.261	1.299	1.339	1.257	1.295	1.214	1.179	1.18	0.662	0.392	0.291	1.312	1.233	1.242
43.5003	1.243	1.222	1.271	1.173	1.133	1.158	1.285	1.253	1.289	1.353	1.259	1.301	1.337	1.257	1.297	1.215	1.177	1.176	0.673	0.408	0.298	1.311	1.236	1.243
43.6669	1.241	1.221	1.273	1.168	1.13	1.156	1.283	1.255	1.288	1.354	1.261	1.302	1.338	1.259	1.298	1.211	1.18	1.175	0.679	0.405	0.296	1.312	1.234	1.243
43.8336	1.243	1.227	1.274	1.173	1.137	1.156	1.285	1.252	1.289	1.354	1.26	1.302	1.338	1.259	1.299	1.214	1.18	1.175	0.694	0.408	0.294	1.312	1.235	1.242
44.0003	1.239	1.225	1.274	1.173	1.135	1.16	1.284	1.257	1.29	1.356	1.267	1.301	1.339	1.26	1.3	1.212	1.181	1.176	0.71	0.421	0.298	1.311	1.237	1.242
44.1669	1.238	1.221	1.276	1.168	1.132	1.163	1.285	1.258	1.291	1.359	1.267	1.303	1.341	1.259	1.295	1.211	1.184	1.179	0.72	0.43	0.313	1.314	1.238	1.244
44.3336	1.241	1.226	1.277	1.173	1.164	1.201	1.285	1.258	1.292	1.358	1.268	1.302	1.344	1.262	1.294	1.21	1.179	1.178	0.741	0.438	0.311	1.316	1.239	1.244
44.5003	1.238	1.226	1.278	1.175	1.163	1.201	1.285	1.255	1.294	1.358	1.268	1.306	1.343	1.259	1.293	1.21	1.184	1.176	0.777	0.452	0.295	1.318	1.24	1.244
44.6669	1.232	1.226	1.279	1.171	1.164	1.207	1.283	1.259	1.292	1.358	1.27	1.299	1.346	1.264	1.294	1.208	1.184	1.181	0.783	0.448	0.309	1.319	1.24	1.243
44.8336	1.236	1.225	1.281	1.169	1.166	1.199	1.285	1.262	1.294	1.359	1.272	1.304	1.347	1.265	1.295	1.209	1.185	1.179	0.792	0.448	0.3	1.319	1.245	1.245
45.0003	1.237	1.223	1.281	1.168	1.165	1.202	1.283	1.26	1.294	1.358	1.272	1.305	1.348	1.264	1.296	1.209	1.187	1.182	0.8	0.439	0.266	1.322	1.241	1.248
45.1669	1.235	1.23	1.283	1.168	1.168	1.201	1.28	1.257	1.297	1.358	1.272	1.307	1.349	1.264	1.297	1.212	1.19	1.18	0.805	0.456	0.318	1.318	1.244	1.248
45.3336	1.235	1.228	1.286	1.169	1.167	1.204	1.282	1.258	1.298	1.359	1.274	1.303	1.351	1.267	1.298	1.212	1.191	1.183	0.815	0.465	0.319	1.32	1.242	1.247
45.5003	1.232	1.228	1.287	1.171	1.174	1.208	1.284	1.258	1.297	1.357	1.276	1.308	1.351	1.269	1.299	1.213	1.192	1.185	0.823	0.466	0.283	1.324	1.246	1.247
45.6669	1.234	1.231	1.287	1.168	1.173	1.205	1.28	1.262	1.3	1.358	1.276	1.306	1.35	1.268	1.304	1.211	1.204	1.184	0.829	0.476	0.278	1.324	1.247	1.247
45.8336	1.233	1.229	1.286	1.169	1.179	1.207	1.28	1.266	1.3	1.357	1.277	1.311	1.351	1.271	1.307	1.213	1.209	1.21	0.835	0.478	0.292	1.325	1.248	1.249
46.0003	1.233	1.229	1.286	1.17	1.18	1.209	1.283	1.268	1.299	1.36	1.276	1.314	1.353	1.27	1.309	1.213	1.211	1.214	0.843	0.48	0.285	1.325	1.248	1.251
46.1669	1.233	1.234	1.288	1.169	1.177	1.211	1.282	1.267	1.301	1.358	1.277	1.315	1.352	1.271	1.31	1.213	1.211	1.217	0.848	0.484	0.291	1.33	1.249	1.25
46.3336	1.23	1.231	1.287	1.172	1.177	1.209	1.281	1.269	1.301	1.359	1.28	1.315	1.353	1.266	1.312	1.216	1.213	1.218	0.872	0.495	0.287	1.333	1.248	1.249
46.5003	1.23	1.236	1.286	1.171	1.182	1.214	1.28	1.27	1.303	1.358	1.28	1.317	1.354	1.268	1.314	1.216	1.241	1.222	0.881	0.483	0.282	1.332	1.249	1.251
46.6669	1.229	1.237	1.285	1.17	1.181	1.212	1.28	1.271	1.304	1.357	1.283	1.318	1.351	1.268	1.316	1.216	1.241	1.22	0.885	0.496	0.318	1.332	1.252	1.253
46.8336	1.229	1.237	1.286	1.174	1.185	1.214	1.281	1.273	1.306	1.359	1.283	1.316	1.353	1.27	1.317	1.219	1.243	1.219	0.896	0.513	0.312	1.335	1.251	1.252
47.0003	1.229	1.236	1.286	1.17	1.184	1.214	1.28	1.273	1.308	1.358	1.286	1.319	1.352	1.271	1.318	1.218	1.246	1.224	0.894	0.512	0.317	1.335	1.251	1.254
47.1669	1.23	1.236	1.285	1.174	1.19	1.215	1.28	1.272	1.307	1.358	1.281	1.322	1.353	1.274	1.317	1.22	1.247	1.23	0.899	0.519	0.329	1.338	1.252	1.254
47.3336	1.225	1.235	1.283	1.175	1.188	1.214	1.28	1.275	1.308	1.359	1.281	1.323	1.353	1.279	1.318	1.224	1.248	1.243	0.911	0.512	0.307	1.338	1.254	1.255
47.5003	1.224	1.235	1.283	1.228	1.191	1.215	1.281	1.274	1.306	1.36	1.28	1.324	1.352	1.279	1.318	1.224	1.249	1.245	0.916	0.527	0.319	1.341	1.256	1.256
47.6669	1.225	1.237	1.283	1.227	1.186	1.213	1.279	1.279	1.306	1.36	1.284	1.326	1.353	1.28	1.321	1.228	1.251	1.244	0.928	0.544	0.33	1.342	1.258	1.256
47.8336	1.225	1.237	1.283	1.23	1.192	1.213	1.278	1.279	1.309	1.358	1.286	1.328	1.35	1.282	1.315	1.231	1.251	1.244	0.98	0.513	0.306	1.34	1.26	1.261
48.0003	1.223	1.237	1.281	1.229	1.187	1.215	1.278	1.28	1.308	1.358	1.288	1.329	1.353	1.282	1.315	1.227	1.253	1.248	0.996	0.548	0.324	1.341	1.261	1.26
48.1669	1.222	1.235	1.282	1.231	1.188	1.218	1.279	1.283	1.31	1.361	1.287	1.33	1.354	1.283	1.317	1.23	1.252	1.248	0.998	0.542	0.319	1.346	1.257	1.26
48.3336	1.226	1.234	1.283	1.227	1.194	1.216	1.278	1.283	1.312	1.362	1.289	1.331	1.355	1.283	1.319	1.24	1.254	1.245	1.005	0.556	0.352	1.345	1.259	1.26
48.5003	1.223	1.234	1.28	1.229	1.195	1.214	1.279	1.286	1.309	1.361	1.291	1.331	1.354	1.285	1.321	1.241	1.255	1.249	1.014	0.551	0.35	1.346	1.263	1.262
48.6669	1.222	1.237	1.28	1.226	1.195	1.213	1.277	1.285	1.308	1.359	1.292	1.33	1.353	1.286	1.321	1.246	1.258	1.248	1.022	0.561	0.374	1.348	1.263	1.26
48.8336	1.222	1.233	1.28	1.224	1.195	1.216	1.278	1.287	1.308	1.365	1.295	1.33	1.356	1.288	1.321	1.243	1.259	1.25	1.035	0.566	0.348	1.349	1.265	1.262
49.0003	1.22	1.234	1.28	1.216	1.196	1.215	1.277	1.287	1.307	1.36	1.298	1.33	1.352	1.288	1.322	1.248	1.261	1.25	1.04	0.568	0.341	1.348	1.265	1.262
49.1669	1.221	1.233	1.278	1.218	1.199	1.218	1.276	1.288	1.308	1.358	1.299	1.33	1.353	1.29	1.324	1.245	1.264	1.252	1.047	0.564	0.351	1.35	1.264	1.263
49.3336	1.222	1.234	1.279	1.212	1.193	1.215	1.275	1.288	1.308	1.359	1.295	1.329	1.353	1.29	1.325	1.244	1.262	1.25	1.091	0.578	0.371	1.352	1.267	1.263
49.5003	1.22	1.231	1.279	1.212	1.197	1.213	1.275	1.285	1.308	1.36	1.297	1.33	1.354	1.291	1.326	1.245	1.265	1.252	1.093	0.58	0.393	1.349	1.264	1.264
49.6669	1.217	1.231	1.277	1.215	1.195	1.213	1.276	1.287	1.306	1.359	1.301	1.328	1.355	1.294	1.326	1.255	1.263	1.249	1.1	0.58	0.392	1.352	1.268	1.263
49.8336	1.215	1.231	1.279	1.224	1.192	1.213	1.276	1.286	1.312	1.359	1.3	1.33	1.354	1.295	1.326	1.259	1.263	1.248	1.103	0.578	0.405	1.355	1.268	1.266
50.0003	1.215	1.232	1.278	1.225	1.192	1.211	1.274	1.284	1.312	1.36	1.296	1.33	1.355	1.295	1.323	1.258	1.267	1.25	1.095	0.585	0.402	1.352	1.267	1.267
50.1669	1.214	1.231	1.276	1.217	1.195	1.21	1.274	1.286	1.31	1.361	1.297	1.328	1.356	1.299	1.322	1.258	1.272	1.25	1.094	0.593	0.401	1.357	1.268	1.266
50.3336	1.215	1.232	1.277	1.214	1.196	1.211	1.276	1.284	1.308	1.362	1.295	1.329	1.356	1.296	1.323	1.26	1.27	1.252	1.097	0.599	0.409	1.358	1.27	1.268
50.5003	1.213	1.232	1.276	1.211	1.197	1.21	1.271	1.284	1.309	1.363	1.296	1.329	1.357	1.298	1.324	1.258	1.271	1.249	1.095	0.603	0.41	1.357	1.269	1.266
50.6669	1.214	1.235	1.276	1.215	1.199	1.211	1.274	1.286	1.308	1.362	1.295	1.329	1.354	1.297	1.325	1.258	1.27	1.251	1.102	0.594	0.424	1.355	1.271	1.268
50.8336	1.212	1.23	1.276	1.209	1.195	1.209	1.274	1.286	1.308	1.364	1.295	1.328	1.356	1.296	1.324	1.26	1.269	1.25	1.102	0.606	0.427	1.36	1.271	1.27
51.0003	1.21	1.231	1.276	1.214	1.197	1.209	1.276	1.285	1.309	1.363	1.298	1.329	1.355	1.298	1.323	1.26	1.273	1.249	1.105	0.604	0.439	1.36	1.271	1.268
51.1669	1.208	1.232	1.275	1.219	1.196	1.207	1.276	1.285	1.309	1.365	1.299	1.327	1.355	1.298	1.324	1.261	1.273	1.25	1.107	0.623	0.444	1.36	1.271	1.268
51.3336	1.209	1.232	1.275	1.211	1.199	1.207	1.276	1.285	1.309	1.361	1.3	1.328	1.356	1.298	1.323	1.282	1.275	1.249	1.109	0.621	0.449	1.362	1.271	1.269
51.5003	1.21	1.229	1.274	1.207	1.194	1.206	1.273	1.285	1.311	1.362	1.299	1.329	1.357	1.298	1.324	1.278	1.271	1.249	1.104	0.628	0.455	1.361	1.273	1.268
51.6669	1.208	1.227	1.272	1.203	1.198	1.202	1.271	1.286	1.314	1.36	1.299	1.328	1.355	1.298	1.325	1.28	1.274	1.25	1.108	0.63	0.462	1.36	1.273	1.268
51.8336	1.21	1.23	1.273	1.206	1.197	1.208	1.272	1.284	1.315	1.361	1.3	1.328	1.355	1.299	1.328	1.282	1.279	1.25	1.112	0.634	0.471	1.361	1.272	1.269
52.0003	1.208	1.227	1.273	1.207	1.193	1.205	1.272	1.286	1.314	1.36	1.299	1.328	1.356	1.299	1.329	1.281	1.276	1.25	1.111	0.64	0.485	1.36	1.27	1.268
52.1669	1.209	1.225	1.273	1.206	1.194	1.207	1.272	1.285	1.314	1.359	1.299	1.328	1.356	1.298	1.329	1.281	1.275	1.25	1.113	0.632	0.493	1.361	1.274	1.269
52.3336	1.201	1.226	1.273	1.207	1.194	1.207	1.274	1.286	1.315	1.36	1.3	1.33	1.354	1.299	1.331	1.282	1.278	1.247	1.117	0.637	0.506	1.362	1.275	1.268
52.5003	1.204	1.225	1.272	1.203	1.191	1.207	1.269	1.284	1.315	1.359	1.299	1.328	1.356	1.297	1.33	1.279	1.275	1.251	1.117	0.635	0.515	1.36	1.275	1.268
52.6669	1.202	1.225	1.271	1.207	1.191	1.205	1.273	1.284	1.316	1.361	1.299	1.328	1.356	1.298	1.331	1.284	1.28	1.249	1.117	0.639	0.521	1.362	1.272	1.27
52.8336	1.201	1.226	1.271	1.208	1.191	1.205	1.272	1.285	1.316	1.362	1.3	1.328	1.355	1.299	1.331	1.281	1.281	1.25	1.123	0.635	0.556	1.365	1.275	1.269
53.0003	1.2	1.224	1.27	1.206	1.192	1.206	1.272	1.284	1.315	1.359	1.3	1.327	1.353	1.299	1.329	1.283	1.277	1.251	1.122	0.644	0.568	1.363	1.273	1.27
53.1669	1.202	1.223	1.269	1.204	1.189	1.207	1.269	1.284	1.315	1.362	1.299	1.327	1.355	1.297	1.331	1.283	1.278	1.25	1.119	0.646	0.572	1.36	1.274	1.269
53.3336	1.198	1.224	1.27	1.201	1.187	1.209	1.269	1.284	1.316	1.359	1.299	1.327	1.355	1.299	1.332	1.282	1.277	1.251	1.127	0.646	0.576	1.362	1.274	1.269
53.5003	1.2	1.224	1.269	1.199	1.187	1.211	1.27	1.282	1.315	1.359	1.298	1.328	1.354	1.298	1.33	1.285	1.278	1.249	1.123	0.658	0.589	1.362	1.273	1.268
53.6669	1.198	1.224	1.27	1.201	1.188	1.211	1.271	1.282	1.314	1.36	1.297	1.328	1.354	1.297	1.331	1.286	1.278	1.248	1.126	0.659	0.59	1.362	1.273	1.269
53.8336	1.199	1.224	1.269	1.197	1.184	1.209	1.267	1.282	1.315	1.36	1.298	1.327	1.354	1.299	1.331	1.281	1.28	1.248	1.124	0.654	0.597	1.362	1.271	1.27
54.0003	1.198	1.221	1.267	1.198	1.185	1.206	1.268	1.284	1.314	1.361	1.3	1.328	1.357	1.3	1.331	1.284	1.282	1.246	1.122	0.662	0.605	1.362	1.274	1.269
54.1669	1.195	1.22	1.267	1.201	1.183	1.204	1.268	1.283	1.315	1.36	1.298	1.326	1.355	1.3	1.332	1.285	1.284	1.245	1.125	0.665	0.61	1.364	1.271	1.269
54.3336	1.192	1.217	1.267	1.198	1.181	1.205	1.267	1.282	1.314	1.359	1.297	1.327	1.354	1.298	1.329	1.283	1.282	1.245	1.125	0.668	0.625	1.363	1.271	1.269
54.5003	1.195	1.218	1.265	1.201	1.182	1.204	1.265	1.283	1.313	1.359	1.298	1.326	1.355	1.297	1.331	1.282	1.283	1.246	1.125	0.664	0.634	1.361	1.273	1.268
54.6669	1.191	1.22	1.264	1.199	1.18	1.203	1.267	1.281	1.314	1.359	1.295	1.325	1.355	1.297	1.331	1.285	1.284	1.245	1.128	0.668	0.64	1.362	1.27	1.269
54.8336	1.192	1.219	1.266	1.193	1.18	1.203	1.266	1.282	1.313	1.359	1.298	1.326	1.355	1.298	1.331	1.286	1.286	1.243	1.123	0.653	0.652	1.361	1.273	1.269
55.0003	1.19	1.217	1.266	1.192	1.176	1.204	1.264	1.28	1.313	1.358	1.297	1.326	1.354	1.297	1.33	1.286	1.286	1.243	1.127	0.667	0.664	1.362	1.271	1.268
55.1669	1.188	1.217	1.264	1.199	1.181	1.204	1.266	1.282	1.315	1.36	1.297	1.325	1.355	1.298	1.33	1.287	1.283	1.243	1.131	0.66	0.671	1.361	1.272	1.269
55.3336	1.192	1.22	1.264	1.193	1.183	1.199	1.264	1.281	1.313	1.359	1.296	1.325	1.353	1.298	1.329	1.283	1.285	1.242	1.125	0.663	0.679	1.361	1.271	1.269
55.5003	1.189	1.215	1.263	1.196	1.179	1.202	1.266	1.28	1.312	1.358	1.297	1.324	1.353	1.298	1.329	1.287	1.287	1.243	1.129	0.654	0.686	1.362	1.271	1.268
55.6669	1.186	1.215	1.265	1.2	1.177	1.202	1.264	1.28	1.312	1.36	1.296	1.325	1.354	1.298	1.328	1.286	1.285	1.241	1.124	0.68	0.69	1.362	1.271	1.268
55.8336	1.189	1.215	1.263	1.194	1.172	1.199	1.262	1.28	1.312	1.357	1.297	1.324	1.354	1.298	1.327	1.287	1.283	1.241	1.122	0.666	0.697	1.362	1.27	1.268
56.0003	1.186	1.216	1.262	1.189	1.176	1.2	1.262	1.28	1.311	1.359	1.297	1.324	1.356	1.298	1.327	1.28	1.285	1.239	1.119	0.661	0.726	1.361	1.27	1.266
56.1669	1.187	1.213	1.262	1.19	1.172	1.199	1.261	1.278	1.312	1.358	1.296	1.324	1.354	1.297	1.327	1.287	1.283	1.24	1.121	0.66	0.734	1.363	1.27	1.267
56.3336	1.183	1.211	1.263	1.195	1.174	1.198	1.262	1.28	1.312	1.359	1.296	1.323	1.355	1.295	1.327	1.278	1.287	1.242	1.119	0.666	0.745	1.361	1.269	1.269
56.5003	1.183	1.214	1.261	1.196	1.175	1.2	1.262	1.28	1.31	1.357	1.295	1.323	1.353	1.297	1.326	1.287	1.287	1.239	1.122	0.682	0.747	1.362	1.268	1.267
56.6669	1.183	1.213	1.261	1.188	1.174	1.196	1.26	1.279	1.311	1.356	1.295	1.323	1.353	1.296	1.327	1.279	1.284	1.238	1.123	0.664	0.773	1.36	1.268	1.269
56.8336	1.185	1.212	1.261	1.19	1.173	1.198	1.26	1.279	1.309	1.357	1.296	1.323	1.354	1.296	1.326	1.275	1.282	1.239	1.122	0.679	0.784	1.361	1.269	1.267
57.0003	1.181	1.212	1.258	1.192	1.17	1.195	1.26	1.279	1.31	1.357	1.296	1.322	1.353	1.298	1.326	1.277	1.288	1.237	1.124	0.656	0.803	1.361	1.269	1.267
57.1669	1.181	1.214	1.259	1.186	1.176	1.196	1.261	1.278	1.311	1.357	1.295	1.323	1.353	1.296	1.326	1.278	1.289	1.24	1.118	0.687	0.809	1.36	1.269	1.268
57.3336	1.181	1.208	1.258	1.19	1.174	1.195	1.259	1.278	1.309	1.358	1.293	1.322	1.35	1.296	1.325	1.279	1.291	1.235	1.12	0.68	0.807	1.36	1.267	1.267
57.5003	1.179	1.211	1.259	1.191	1.173	1.196	1.259	1.277	1.309	1.357	1.294	1.322	1.354	1.295	1.326	1.28	1.288	1.236	1.121	0.696	0.816	1.361	1.266	1.267
57.6669	1.175	1.21	1.258	1.19	1.174	1.195	1.26	1.276	1.309	1.356	1.293	1.323	1.354	1.295	1.325	1.282	1.287	1.234	1.12	0.652	0.824	1.362	1.266	1.266
57.8336	1.18	1.211	1.258	1.183	1.173	1.195	1.255	1.279	1.31	1.358	1.295	1.321	1.353	1.297	1.326	1.28	1.289	1.236	1.115	0.702	0.841	1.361	1.267	1.266
58.0003	1.18	1.21	1.256	1.186	1.168	1.194	1.258	1.278	1.309	1.356	1.295	1.322	1.352	1.297	1.324	1.273	1.29	1.237	1.114	0.701	0.855	1.361	1.267	1.266
58.1669	1.177	1.21	1.256	1.183	1.171	1.191	1.259	1.277	1.309	1.355	1.293	1.322	1.352	1.296	1.323	1.277	1.286	1.236	1.116	0.708	0.859	1.36	1.266	1.267
58.3336	1.176	1.21	1.257	1.185	1.168	1.191	1.257	1.276	1.309	1.355	1.291	1.322	1.352	1.294	1.325	1.275	1.286	1.234	1.118	0.702	0.87	1.361	1.266	1.265
58.5003	1.171	1.206	1.256	1.186	1.172	1.189	1.26	1.277	1.309	1.358	1.293	1.322	1.354	1.295	1.325	1.278	1.286	1.237	1.119	0.713	0.873	1.362	1.266	1.266
58.6669	1.175	1.206	1.255	1.182	1.168	1.187	1.257	1.274	1.307	1.356	1.291	1.32	1.352	1.293	1.325	1.277	1.287	1.237	1.12	0.7	0.883	1.363	1.264	1.265
58.8336	1.174	1.208	1.255	1.181	1.169	1.188	1.255	1.276	1.307	1.356	1.292	1.321	1.351	1.294	1.324	1.277	1.288	1.232	1.13	0.713	0.894	1.36	1.264	1.266
59.0003	1.174	1.205	1.254	1.182	1.167	1.187	1.256	1.275	1.308	1.353	1.291	1.32	1.35	1.292	1.325	1.27	1.287	1.234	1.141	0.712	0.915	1.361	1.263	1.264
59.1669	1.171	1.206	1.254	1.183	1.166	1.189	1.255	1.276	1.307	1.355	1.291	1.321	1.352	1.295	1.323	1.269	1.287	1.232	1.138	0.707	0.92	1.362	1.265	1.265
59.3336	1.168	1.204	1.255	1.182	1.164	1.188	1.257	1.274	1.307	1.355	1.291	1.32	1.351	1.293	1.323	1.27	1.287	1.23	1.143	0.698	0.926	1.36	1.264	1.266
59.5003	1.169	1.203	1.254	1.178	1.165	1.186	1.253	1.273	1.308	1.355	1.29	1.32	1.352	1.294	1.324	1.269	1.287	1.229	1.14	0.696	0.94	1.36	1.264	1.266
59.6669	1.17	1.206	1.252	1.178	1.165	1.187	1.254	1.274	1.306	1.356	1.29	1.319	1.352	1.293	1.323	1.268	1.288	1.23	1.14	0.713	0.944	1.361	1.262	1.265
59.8336	1.167	1.204	1.252	1.177	1.165	1.184	1.251	1.274	1.306	1.355	1.291	1.319	1.352	1.293	1.324	1.268	1.285	1.231	1.144	0.716	0.949	1.36	1.262	1.265
60.0003	1.164	1.204	1.251	1.182	1.167	1.182	1.255	1.274	1.306	1.354	1.291	1.32	1.352	1.293	1.324	1.271	1.286	1.231	1.145	0.72	0.959	1.361	1.262	1.264
60.1669	1.163	1.202	1.252	1.174	1.166	1.179	1.251	1.273	1.305	1.354	1.29	1.319	1.35	1.293	1.323	1.267	1.284	1.23	1.142	0.721	0.965	1.359	1.262	1.265
60.3336	1.165	1.202	1.251	1.173	1.163	1.182	1.25	1.272	1.305	1.353	1.29	1.318	1.35	1.292	1.322	1.267	1.282	1.233	1.142	0.722	0.971	1.36	1.261	1.265
60.5003	1.164	1.201	1.25	1.175	1.16	1.181	1.251	1.273	1.305	1.354	1.291	1.318	1.351	1.293	1.323	1.267	1.281	1.229	1.138	0.719	0.977	1.359	1.262	1.264
60.6669	1.163	1.201	1.25	1.173	1.16	1.181	1.251	1.273	1.304	1.354	1.29	1.319	1.35	1.292	1.324	1.263	1.282	1.229	1.14	0.711	0.985	1.36	1.262	1.263
60.8336	1.162	1.197	1.249	1.177	1.159	1.176	1.251	1.272	1.305	1.352	1.288	1.317	1.35	1.29	1.322	1.267	1.281	1.229	1.142	0.719	0.989	1.36	1.259	1.261
61.0003	1.158	1.202	1.249	1.168	1.162	1.175	1.248	1.273	1.304	1.356	1.29	1.316	1.352	1.293	1.322	1.263	1.283	1.228	1.148	0.724	0.99	1.363	1.26	1.259
61.1669	1.164	1.197	1.247	1.171	1.161	1.179	1.249	1.271	1.303	1.353	1.288	1.318	1.35	1.291	1.322	1.263	1.281	1.229	1.152	0.722	0.989	1.361	1.258	1.261
61.3336	1.163	1.199	1.247	1.171	1.16	1.178	1.248	1.272	1.305	1.353	1.29	1.316	1.35	1.292	1.323	1.265	1.284	1.227	1.152	0.723	0.991	1.36	1.26	1.261
61.5003	1.157	1.201	1.248	1.17	1.157	1.175	1.247	1.272	1.303	1.355	1.289	1.317	1.352	1.292	1.322	1.264	1.283	1.23	1.151	0.734	0.992	1.363	1.259	1.261
61.6669	1.157	1.199	1.245	1.169	1.161	1.178	1.249	1.271	1.303	1.356	1.288	1.316	1.353	1.29	1.322	1.264	1.281	1.226	1.153	0.726	0.993	1.362	1.258	1.26
61.8336	1.157	1.2	1.246	1.172	1.158	1.173	1.25	1.27	1.303	1.353	1.288	1.316	1.351	1.29	1.321	1.266	1.28	1.225	1.153	0.719	0.997	1.362	1.258	1.26
62.0003	1.158	1.196	1.246	1.166	1.153	1.176	1.246	1.268	1.303	1.353	1.285	1.316	1.351	1.288	1.321	1.261	1.28	1.226	1.153	0.718	0.994	1.359	1.256	1.261
62.1669	1.155	1.198	1.245	1.166	1.159	1.177	1.245	1.27	1.302	1.352	1.286	1.315	1.349	1.29	1.322	1.261	1.281	1.226	1.153	0.722	0.993	1.359	1.257	1.261
62.3336	1.153	1.196	1.243	1.167	1.157	1.175	1.247	1.269	1.301	1.353	1.287	1.315	1.351	1.288	1.32	1.261	1.279	1.227	1.153	0.733	0.997	1.361	1.257	1.259
62.5003	1.148	1.195	1.244	1.168	1.156	1.171	1.247	1.268	1.301	1.352	1.286	1.316	1.351	1.289	1.321	1.264	1.279	1.225	1.154	0.729	1.001	1.361	1.256	1.26
62.6669	1.15	1.195	1.243	1.168	1.154	1.173	1.246	1.267	1.299	1.353	1.285	1.316	1.35	1.289	1.319	1.264	1.275	1.226	1.154	0.72	1.003	1.359	1.255	1.257
62.8336	1.15	1.195	1.243	1.168	1.155	1.173	1.247	1.267	1.301	1.352	1.285	1.314	1.35	1.287	1.32	1.263	1.276	1.227	1.154	0.734	1.007	1.36	1.255	1.259
63.0003	1.151	1.192	1.241	1.164	1.15	1.171	1.243	1.268	1.301	1.352	1.285	1.312	1.349	1.289	1.319	1.258	1.278	1.226	1.153	0.729	1.009	1.359	1.256	1.259
63.1669	1.149	1.191	1.241	1.163	1.154	1.168	1.243	1.266	1.301	1.354	1.284	1.314	1.35	1.287	1.32	1.26	1.278	1.224	1.152	0.722	1.007	1.36	1.255	1.259
63.3336	1.147	1.194	1.241	1.167	1.15	1.169	1.246	1.267	1.3	1.352	1.284	1.314	1.35	1.287	1.32	1.261	1.277	1.222	1.152	0.737	1.01	1.361	1.254	1.258
63.5003	1.149	1.192	1.241	1.162	1.151	1.168	1.241	1.266	1.299	1.353	1.285	1.314	1.35	1.287	1.319	1.257	1.275	1.224	1.15	0.74	1.014	1.359	1.256	1.257
63.6669	1.147	1.191	1.24	1.16	1.148	1.17	1.241	1.266	1.299	1.351	1.284	1.312	1.347	1.288	1.318	1.258	1.274	1.223	1.147	0.736	1.019	1.36	1.255	1.259
63.8336	1.145	1.195	1.239	1.169	1.151	1.171	1.245	1.264	1.299	1.351	1.283	1.312	1.348	1.285	1.318	1.26	1.276	1.221	1.147	0.736	1.021	1.358	1.251	1.257
64.0003	1.144	1.189	1.238	1.161	1.15	1.167	1.242	1.265	1.298	1.352	1.284	1.312	1.348	1.285	1.317	1.26	1.275	1.223	1.147	0.739	1.022	1.359	1.252	1.257
64.1669	1.142	1.187	1.239	1.164	1.146	1.169	1.243	1.264	1.298	1.35	1.283	1.312	1.349	1.285	1.318	1.26	1.274	1.221	1.148	0.739	1.017	1.361	1.251	1.257
64.3336	1.141	1.191	1.238	1.162	1.147	1.168	1.242	1.265	1.296	1.351	1.283	1.311	1.348	1.286	1.318	1.258	1.273	1.224	1.146	0.745	1.021	1.361	1.252	1.257
64.5003	1.145	1.185	1.238	1.162	1.145	1.164	1.24	1.263	1.298	1.35	1.282	1.312	1.348	1.285	1.317	1.258	1.273	1.222	1.145	0.741	1.013	1.357	1.251	1.257
64.6669	1.139	1.19	1.237	1.162	1.147	1.166	1.242	1.263	1.296	1.351	1.281	1.313	1.35	1.284	1.317	1.26	1.272	1.221	1.144	0.748	1.018	1.36	1.25	1.257
64.8336	1.138	1.184	1.235	1.158	1.145	1.162	1.239	1.262	1.296	1.35	1.279	1.31	1.347	1.283	1.316	1.255	1.272	1.22	1.141	0.753	1.017	1.358	1.248	1.255
65.0003	1.137	1.186	1.235	1.158	1.146	1.164	1.24	1.263	1.297	1.349	1.281	1.31	1.347	1.282	1.317	1.256	1.273	1.221	1.142	0.752	1.021	1.359	1.249	1.256
65.1669	1.139	1.185	1.237	1.158	1.145	1.161	1.238	1.263	1.296	1.35	1.281	1.311	1.348	1.284	1.316	1.255	1.271	1.219	1.139	0.753	1.02	1.358	1.251	1.255
65.3336	1.135	1.187	1.236	1.159	1.143	1.162	1.24	1.264	1.297	1.347	1.281	1.311	1.346	1.283	1.317	1.256	1.272	1.218	1.141	0.754	1.02	1.358	1.251	1.256
65.5003	1.137	1.185	1.232	1.155	1.141	1.165	1.235	1.262	1.293	1.348	1.28	1.31	1.347	1.282	1.316	1.25	1.27	1.222	1.139	0.751	1.018	1.359	1.25	1.256
65.6669	1.134	1.187	1.234	1.159	1.14	1.16	1.237	1.262	1.294	1.349	1.279	1.309	1.347	1.282	1.316	1.255	1.269	1.221	1.141	0.756	1.015	1.358	1.248	1.255
65.8336	1.133	1.185	1.234	1.151	1.14	1.159	1.234	1.26	1.295	1.35	1.278	1.31	1.348	1.281	1.316	1.251	1.27	1.216	1.139	0.748	1.019	1.359	1.248	1.256
66.0003	1.134	1.182	1.233	1.156	1.14	1.162	1.237	1.262	1.294	1.346	1.28	1.31	1.345	1.282	1.315	1.252	1.268	1.22	1.14	0.749	1.018	1.357	1.249	1.256
66.1669	1.13	1.183	1.232	1.153	1.14	1.159	1.237	1.26	1.293	1.349	1.278	1.31	1.348	1.28	1.315	1.253	1.265	1.22	1.138	0.764	1.014	1.358	1.248	1.255
66.3336	1.13	1.182	1.231	1.151	1.139	1.159	1.234	1.259	1.294	1.348	1.278	1.308	1.346	1.28	1.315	1.252	1.268	1.22	1.137	0.732	1.018	1.357	1.247	1.254
66.5003	1.128	1.181	1.229	1.153	1.138	1.157	1.233	1.261	1.293	1.348	1.277	1.309	1.347	1.28	1.315	1.251	1.27	1.22	1.136	0.741	1.018	1.358	1.246	1.254
66.6669	1.127	1.184	1.231	1.155	1.14	1.157	1.234	1.26	1.292	1.349	1.277	1.307	1.348	1.278	1.315	1.254	1.267	1.217	1.137	0.751	1.014	1.358	1.247	1.255
66.8336	1.13	1.181	1.229	1.154	1.137	1.156	1.233	1.257	1.292	1.347	1.274	1.308	1.346	1.277	1.314	1.252	1.265	1.219	1.136	0.753	1.013	1.355	1.244	1.253
67.0003	1.127	1.181	1.229	1.153	1.131	1.158	1.234	1.259	1.291	1.347	1.276	1.307	1.346	1.278	1.313	1.253	1.266	1.221	1.137	0.747	1.013	1.355	1.244	1.251
67.1669	1.127	1.18	1.229	1.151	1.136	1.156	1.233	1.258	1.29	1.346	1.275	1.306	1.347	1.278	1.313	1.251	1.266	1.217	1.138	0.747	1.015	1.356	1.245	1.253
67.3336	1.125	1.181	1.228	1.153	1.137	1.155	1.232	1.258	1.292	1.346	1.275	1.307	1.346	1.278	1.313	1.249	1.264	1.218	1.137	0.744	1.015	1.355	1.244	1.253
67.5003	1.121	1.182	1.226	1.151	1.134	1.154	1.232	1.256	1.291	1.348	1.273	1.306	1.346	1.277	1.312	1.25	1.262	1.219	1.138	0.756	1.008	1.356	1.243	1.25
67.6669	1.119	1.176	1.228	1.15	1.135	1.156	1.234	1.255	1.29	1.348	1.273	1.305	1.348	1.274	1.313	1.253	1.261	1.219	1.137	0.763	1.003	1.357	1.243	1.252
67.8336	1.12	1.177	1.227	1.147	1.135	1.154	1.232	1.256	1.29	1.347	1.273	1.305	1.346	1.275	1.313	1.249	1.263	1.221	1.133	0.766	1.004	1.355	1.243	1.252
68.0003	1.118	1.179	1.226	1.143	1.134	1.153	1.229	1.256	1.29	1.348	1.273	1.304	1.346	1.277	1.31	1.248	1.264	1.218	1.132	0.752	1.006	1.357	1.244	1.251
68.1669	1.115	1.177	1.225	1.149	1.132	1.154	1.233	1.255	1.29	1.348	1.274	1.305	1.348	1.275	1.311	1.249	1.261	1.22	1.13	0.753	1.006	1.357	1.243	1.25
68.3336	1.115	1.176	1.225	1.147	1.13	1.148	1.229	1.254	1.29	1.346	1.272	1.306	1.346	1.274	1.312	1.25	1.258	1.219	1.129	0.766	1.022	1.356	1.242	1.251
68.5003	1.113	1.176	1.226	1.147	1.131	1.15	1.23	1.256	1.29	1.347	1.272	1.305	1.347	1.274	1.312	1.249	1.26	1.219	1.13	0.752	1.022	1.358	1.243	1.25
68.6669	1.116	1.177	1.224	1.146	1.134	1.151	1.227	1.255	1.288	1.345	1.27	1.306	1.345	1.274	1.312	1.246	1.26	1.218	1.128	0.762	1.021	1.354	1.24	1.25
68.8336	1.114	1.174	1.224	1.142	1.131	1.149	1.227	1.255	1.288	1.346	1.272	1.304	1.345	1.272	1.31	1.248	1.258	1.219	1.13	0.772	1.015	1.355	1.24	1.25
69.0003	1.114	1.175	1.222	1.142	1.128	1.15	1.226	1.253	1.287	1.344	1.271	1.303	1.344	1.272	1.31	1.246	1.26	1.222	1.129	0.771	1.02	1.354	1.241	1.249
69.1669	1.113	1.171	1.222	1.143	1.131	1.149	1.227	1.252	1.286	1.346	1.27	1.303	1.344	1.272	1.31	1.245	1.26	1.221	1.126	0.771	1.019	1.354	1.238	1.248
69.3336	1.112	1.175	1.222	1.143	1.13	1.148	1.228	1.253	1.289	1.345	1.27	1.304	1.345	1.273	1.311	1.247	1.256	1.22	1.127	0.763	1.015	1.355	1.24	1.249
69.5003	1.113	1.172	1.222	1.145	1.134	1.148	1.227	1.25	1.287	1.344	1.268	1.302	1.344	1.271	1.31	1.243	1.259	1.218	1.127	0.766	1.015	1.353	1.237	1.247
69.6669	1.107	1.173	1.22	1.143	1.131	1.146	1.227	1.251	1.287	1.344	1.268	1.302	1.343	1.27	1.31	1.247	1.258	1.22	1.125	0.769	1.016	1.354	1.237	1.247
69.8336	1.108	1.173	1.221	1.138	1.129	1.147	1.224	1.251	1.285	1.346	1.269	1.303	1.345	1.272	1.308	1.243	1.255	1.218	1.122	0.769	1.015	1.353	1.237	1.248
70.0003	1.106	1.172	1.222	1.139	1.127	1.148	1.223	1.248	1.286	1.344	1.267	1.302	1.344	1.269	1.31	1.245	1.255	1.223	1.126	0.765	1.016	1.355	1.236	1.248
70.1669	1.105	1.172	1.22	1.138	1.124	1.144	1.223	1.249	1.285	1.343	1.266	1.302	1.344	1.268	1.309	1.242	1.251	1.221	1.125	0.771	1.011	1.354	1.237	1.246
70.3336	1.104	1.167	1.219	1.135	1.126	1.144	1.222	1.25	1.286	1.344	1.268	1.301	1.344	1.27	1.309	1.241	1.254	1.222	1.127	0.775	1.017	1.352	1.237	1.248
70.5003	1.102	1.169	1.22	1.136	1.127	1.144	1.223	1.248	1.285	1.344	1.266	1.301	1.343	1.267	1.308	1.243	1.254	1.221	1.123	0.767	1.016	1.353	1.234	1.248
70.6669	1.1	1.168	1.219	1.136	1.124	1.143	1.223	1.247	1.285	1.344	1.264	1.302	1.342	1.268	1.309	1.238	1.253	1.22	1.123	0.773	1.016	1.354	1.234	1.248
70.8336	1.1	1.171	1.218	1.138	1.124	1.144	1.226	1.248	1.284	1.345	1.266	1.302	1.344	1.269	1.308	1.244	1.251	1.222	1.121	0.778	1.017	1.353	1.236	1.246
71.0003	1.101	1.17	1.216	1.138	1.123	1.144	1.223	1.249	1.284	1.344	1.266	1.302	1.343	1.269	1.309	1.241	1.253	1.222	1.119	0.781	1.026	1.353	1.235	1.247
71.1669	1.097	1.168	1.218	1.138	1.125	1.138	1.223	1.247	1.284	1.344	1.266	1.302	1.342	1.267	1.309	1.242	1.249	1.223	1.12	0.772	1.024	1.351	1.235	1.247
71.3336	1.099	1.166	1.216	1.135	1.12	1.14	1.222	1.246	1.283	1.341	1.265	1.301	1.343	1.268	1.307	1.241	1.249	1.221	1.115	0.768	1.017	1.352	1.235	1.246
71.5003	1.093	1.166	1.216	1.137	1.125	1.139	1.222	1.245	1.283	1.343	1.264	1.3	1.344	1.266	1.307	1.241	1.254	1.224	1.116	0.771	1.017	1.352	1.231	1.245
71.6669	1.094	1.165	1.215	1.135	1.122	1.14	1.223	1.247	1.282	1.344	1.266	1.299	1.344	1.267	1.307	1.242	1.249	1.225	1.117	0.766	1.016	1.353	1.232	1.245
71.8336	1.088	1.163	1.216	1.136	1.123	1.137	1.221	1.245	1.282	1.344	1.264	1.299	1.343	1.267	1.307	1.24	1.248	1.224	1.116	0.785	1.017	1.352	1.232	1.245
72.0003	1.095	1.163	1.216	1.132	1.121	1.137	1.219	1.242	1.282	1.344	1.262	1.299	1.342	1.264	1.307	1.239	1.25	1.225	1.115	0.784	1.017	1.353	1.229	1.245
72.1669	1.09	1.165	1.215	1.131	1.12	1.138	1.22	1.245	1.282	1.344	1.262	1.3	1.344	1.265	1.306	1.242	1.247	1.226	1.115	0.783	1.051	1.352	1.229	1.245
72.3336	1.092	1.162	1.214	1.133	1.119	1.135	1.22	1.244	1.281	1.342	1.264	1.299	1.342	1.266	1.307	1.238	1.248	1.222	1.114	0.779	1.047	1.35	1.229	1.245
72.5003	1.085	1.161	1.212	1.129	1.116	1.139	1.217	1.243	1.281	1.341	1.264	1.299	1.34	1.266	1.306	1.235	1.244	1.228	1.114	0.776	1.05	1.351	1.23	1.246
72.6669	1.079	1.161	1.212	1.135	1.117	1.134	1.222	1.243	1.281	1.343	1.263	1.298	1.343	1.266	1.306	1.243	1.245	1.227	1.115	0.777	1.047	1.353	1.229	1.245
72.8336	1.086	1.163	1.211	1.136	1.118	1.135	1.22	1.242	1.28	1.341	1.262	1.298	1.34	1.265	1.306	1.238	1.247	1.228	1.113	0.779	1.045	1.352	1.228	1.244
73.0003	1.086	1.16	1.212	1.131	1.116	1.134	1.218	1.242	1.28	1.342	1.262	1.298	1.342	1.265	1.305	1.237	1.246	1.228	1.112	0.782	1.049	1.35	1.229	1.244
73.1669	1.09	1.16	1.21	1.129	1.114	1.135	1.217	1.243	1.28	1.341	1.261	1.298	1.34	1.265	1.307	1.236	1.244	1.228	1.115	0.784	1.049	1.351	1.227	1.244
73.3336	1.081	1.161	1.21	1.129	1.112	1.134	1.218	1.242	1.28	1.341	1.262	1.297	1.341	1.264	1.306	1.236	1.244	1.229	1.111	0.774	1.043	1.35	1.228	1.245
73.5003	1.076	1.16	1.212	1.13	1.115	1.13	1.217	1.241	1.279	1.343	1.261	1.297	1.342	1.264	1.305	1.238	1.246	1.228	1.107	0.788	1.046	1.351	1.228	1.243
73.6669	1.079	1.16	1.21	1.128	1.114	1.128	1.215	1.24	1.278	1.341	1.26	1.296	1.34	1.263	1.306	1.236	1.244	1.226	1.11	0.775	1.045	1.35	1.227	1.243
73.8336	1.075	1.157	1.209	1.127	1.109	1.134	1.216	1.239	1.277	1.34	1.259	1.297	1.341	1.262	1.305	1.234	1.241	1.229	1.108	0.786	1.044	1.35	1.226	1.243
74.0003	1.079	1.162	1.208	1.125	1.109	1.131	1.212	1.238	1.277	1.34	1.259	1.295	1.341	1.262	1.305	1.235	1.242	1.228	1.111	0.777	1.045	1.349	1.224	1.242
74.1669	1.072	1.154	1.208	1.126	1.11	1.127	1.215	1.241	1.276	1.34	1.26	1.295	1.341	1.263	1.304	1.235	1.241	1.226	1.11	0.784	1.043	1.35	1.224	1.241
74.3336	1.073	1.16	1.208	1.126	1.111	1.128	1.215	1.238	1.275	1.342	1.259	1.296	1.341	1.261	1.304	1.234	1.242	1.225	1.119	0.783	1.045	1.348	1.223	1.241
74.5003	1.07	1.154	1.206	1.126	1.108	1.13	1.215	1.239	1.274	1.342	1.259	1.295	1.341	1.262	1.304	1.231	1.24	1.228	1.118	0.784	1.047	1.348	1.224	1.24
74.6669	1.072	1.155	1.205	1.123	1.107	1.128	1.213	1.237	1.274	1.34	1.258	1.294	1.338	1.259	1.303	1.233	1.24	1.225	1.116	0.777	1.046	1.348	1.223	1.24
74.8336	1.067	1.152	1.206	1.124	1.107	1.126	1.212	1.235	1.274	1.34	1.257	1.294	1.34	1.26	1.303	1.228	1.241	1.226	1.117	0.778	1.05	1.349	1.221	1.239
75.0003	1.068	1.152	1.204	1.127	1.102	1.126	1.214	1.236	1.274	1.339	1.258	1.293	1.34	1.26	1.302	1.233	1.235	1.229	1.116	0.766	1.048	1.347	1.223	1.239
75.1669	1.064	1.151	1.205	1.121	1.107	1.127	1.212	1.235	1.273	1.341	1.256	1.292	1.341	1.258	1.302	1.231	1.24	1.229	1.115	0.776	1.047	1.349	1.221	1.239
75.3336	1.063	1.151	1.204	1.122	1.106	1.124	1.209	1.234	1.273	1.34	1.256	1.293	1.34	1.258	1.303	1.228	1.237	1.227	1.115	0.772	1.049	1.348	1.219	1.24
75.5003	1.061	1.154	1.204	1.118	1.106	1.121	1.21	1.236	1.272	1.341	1.257	1.293	1.341	1.26	1.303	1.226	1.237	1.229	1.112	0.778	1.053	1.348	1.221	1.239
75.6669	1.061	1.149	1.204	1.117	1.102	1.124	1.209	1.233	1.271	1.339	1.254	1.292	1.338	1.257	1.302	1.227	1.237	1.229	1.112	0.773	1.049	1.347	1.219	1.237
75.8336	1.062	1.148	1.202	1.118	1.099	1.123	1.209	1.235	1.271	1.338	1.256	1.292	1.337	1.258	1.301	1.226	1.236	1.229	1.112	0.772	1.045	1.347	1.22	1.236
76.0003	1.059	1.151	1.203	1.118	1.101	1.117	1.208	1.233	1.272	1.338	1.255	1.289	1.339	1.258	1.301	1.226	1.234	1.225	1.112	0.767	1.054	1.348	1.219	1.236
76.1669	1.054	1.147	1.201	1.12	1.101	1.12	1.211	1.232	1.269	1.341	1.254	1.291	1.34	1.257	1.3	1.228	1.235	1.228	1.112	0.776	1.059	1.349	1.217	1.237
76.3336	1.049	1.148	1.2	1.118	1.102	1.12	1.21	1.233	1.271	1.34	1.255	1.289	1.341	1.257	1.299	1.226	1.234	1.224	1.111	0.773	1.061	1.35	1.217	1.236
76.5003	1.055	1.149	1.2	1.115	1.099	1.119	1.206	1.232	1.27	1.339	1.254	1.29	1.34	1.256	1.3	1.222	1.234	1.225	1.111	0.768	1.055	1.348	1.216	1.236
76.6669	1.051	1.149	1.198	1.114	1.098	1.115	1.208	1.233	1.269	1.338	1.254	1.289	1.338	1.258	1.299	1.229	1.233	1.226	1.111	0.77	1.052	1.348	1.218	1.235
76.8336	1.052	1.147	1.199	1.116	1.101	1.119	1.206	1.23	1.27	1.337	1.252	1.289	1.336	1.255	1.301	1.226	1.235	1.227	1.11	0.753	1.056	1.347	1.216	1.235
77.0003	1.051	1.145	1.2	1.116	1.094	1.116	1.207	1.231	1.268	1.34	1.253	1.289	1.339	1.255	1.3	1.225	1.231	1.225	1.111	0.743	1.048	1.349	1.216	1.236
77.1669	1.046	1.143	1.196	1.112	1.093	1.113	1.204	1.23	1.267	1.338	1.253	1.287	1.338	1.256	1.297	1.223	1.229	1.226	1.112	0.748	1.054	1.348	1.215	1.233
77.3336	1.047	1.142	1.197	1.111	1.095	1.112	1.204	1.23	1.267	1.337	1.253	1.288	1.336	1.255	1.299	1.223	1.231	1.225	1.109	0.753	1.055	1.347	1.216	1.234
77.5003	1.044	1.145	1.197	1.116	1.09	1.114	1.206	1.229	1.267	1.338	1.251	1.287	1.34	1.255	1.298	1.225	1.228	1.225	1.109	0.754	1.057	1.349	1.213	1.233
77.6669	1.042	1.144	1.196	1.11	1.09	1.111	1.203	1.229	1.268	1.339	1.252	1.288	1.338	1.254	1.297	1.219	1.23	1.226	1.108	0.753	1.053	1.35	1.214	1.235
77.8336	1.041	1.145	1.195	1.111	1.091	1.11	1.204	1.227	1.265	1.337	1.251	1.287	1.336	1.254	1.296	1.221	1.229	1.226	1.106	0.754	1.08	1.348	1.214	1.233
78.0003	1.042	1.143	1.195	1.107	1.086	1.108	1.203	1.23	1.266	1.336	1.252	1.286	1.337	1.254	1.297	1.222	1.227	1.224	1.106	0.757	1.078	1.346	1.213	1.231
78.1669	1.034	1.143	1.195	1.11	1.086	1.107	1.204	1.227	1.265	1.338	1.25	1.285	1.338	1.253	1.296	1.22	1.225	1.224	1.106	0.757	1.081	1.348	1.211	1.232
78.3336	1.035	1.141	1.193	1.108	1.083	1.109	1.201	1.227	1.264	1.337	1.251	1.283	1.338	1.253	1.295	1.218	1.227	1.223	1.108	0.761	1.074	1.348	1.212	1.231
78.5003	1.039	1.14	1.193	1.105	1.086	1.105	1.2	1.227	1.263	1.337	1.248	1.284	1.338	1.252	1.295	1.217	1.224	1.222	1.109	0.76	1.066	1.348	1.211	1.231
78.6669	1.028	1.137	1.194	1.103	1.087	1.104	1.201	1.227	1.264	1.338	1.249	1.283	1.338	1.251	1.294	1.218	1.227	1.224	1.106	0.759	1.063	1.35	1.21	1.231
78.8336	1.031	1.138	1.193	1.103	1.081	1.104	1.2	1.226	1.263	1.335	1.248	1.284	1.336	1.25	1.293	1.22	1.223	1.223	1.106	0.757	1.066	1.347	1.208	1.231
79.0003	1.025	1.137	1.19	1.102	1.08	1.104	1.198	1.228	1.263	1.335	1.248	1.283	1.336	1.251	1.293	1.215	1.222	1.223	1.11	0.758	1.057	1.347	1.21	1.228
79.1669	1.028	1.136	1.191	1.102	1.079	1.101	1.198	1.225	1.262	1.335	1.248	1.282	1.335	1.251	1.294	1.217	1.223	1.221	1.104	0.759	1.056	1.348	1.208	1.229
79.3336	1.024	1.139	1.19	1.101	1.077	1.103	1.198	1.226	1.262	1.336	1.249	1.283	1.336	1.252	1.292	1.216	1.221	1.221	1.102	0.756	1.052	1.348	1.209	1.23
79.5003	1.02	1.136	1.189	1.098	1.081	1.104	1.197	1.225	1.261	1.335	1.249	1.281	1.335	1.251	1.293	1.216	1.221	1.225	1.108	0.757	1.052	1.347	1.208	1.229
79.6669	1.017	1.133	1.188	1.1	1.078	1.103	1.195	1.225	1.26	1.334	1.249	1.281	1.335	1.251	1.292	1.213	1.22	1.223	1.108	0.763	1.049	1.347	1.208	1.228
79.8336	1.013	1.135	1.188	1.098	1.077	1.1	1.194	1.225	1.261	1.335	1.248	1.281	1.335	1.251	1.291	1.215	1.22	1.22	1.105	0.759	1.046	1.348	1.207	1.229

## Sheet: Panel b
	Doubling time (hours)
WT	1.19549
	1.43598
	1.64956
kre6Δ/Δ	3.42803
	3.47791
	3.77326
kre62Δ/Δ	1.43183
	1.60637
	1.78095
skn1Δ/Δ	1.65074
	1.75391
	1.8381
skn2Δ/Δ	1.60488
	1.65825
	1.69972
kre6/skn1Δ/Δ	3.56741
	3.81059
	3.56924
kre6/skn1/kre62/skn2Δ/Δ	3.70073
	6.06959
	5.24714
kre6/skn1/kre62/skn2Δ/Δ + PACT1-KRE6	2.43637
	2.34568
	2.41263
