# Supplementary material for: β-1,6-Glucan plays a central role in the structure and remodeling of the bilaminate fungal cell wall
Source: eLife. 2024 Dec 5;13:RP100569. doi: 10.7554/eLife.100569 (PMC11620752; doi:10.7554/eLife.100569)
Supplement: Figure 5—source data 1. [file elife-100569-fig5-data1.xlsx]

## Sheet: Panel b
																																											Mean	SD
Thickness (nm)- Inner layer	WT	121	151	95.5	101	109	108	98.8	127	180	147	60.9	107	145	113	95.5	93.5	99	97	123	90.5	113	101	91.3	93.3	92.5	81.4	83.6	95.8	87.4	82.2	105	95.2	111	116	97.5	97	147					106.835	23.2062
	kre6Δ/Δ	484	444	145	123	217	151	282	198	317	289	381	280	251	187	137	145	287	149	179	244	306	299	272	206	190	157	162	179	173	139	128	110	89.6	169	144	142	187	125	161	173		210.04	89.6048
	kre62Δ/Δ	142	126	145	115	112	116	118	105	127	138	86.4	112	102	140	114	103	115	118	113	95.8	102	81.1	83.1	80.9	90.6	90.5	107	101	103	70.9	95.3	104	125	115	102	89.3	128					108.43	18.0609
	skn1Δ/Δ	129	131	127	124	86.6	174	163	118	158	114	130	132	115	139	151	157	147	143	150	164	165	156	134	131	80.6	127	152	87.1	144	147	139	145	156	136	87.8	93	86.8					132.97	25.01
	skn2Δ/Δ	159	142	124	99.8	165	109	98	115	115	114	111	105	116	102	106	151	110	104	148	167	147	174	126	157	133	111	116	106	107	121	128	79.1	174	88.4	177	155	125	100	114			125.623	25.8193
	kre6/skn1Δ/Δ	184	172	186	138	128	113	223	222	140	185	230	222	154	251	367	279	261	85.2	214	286	247	232	331	251	267	278	264	230	238	170	233	290	317	351	114	140	142	170	177	159		216.03	68.1575
	kre6/skn1/kre62/skn2Δ/Δ	438	488	478	466	432	401	419	535	532	559	587	480	514	471	416	451	430	352	398	339	329	322	873	848	860	137	154	117	370	339	359	434	418	452	458	407	434	452	350	296		439.875	158.158
	kre6/skn1/kre62/skn2Δ/Δ+PACT1-KRE6	103	106	103	102	105	95.8	124	128	114	104	119	102	96.8	106	79.1	79.9	72.6	123	157	152	158	150	109	123	105	101	103	115	118	111	107	135	139	128	126	125	124	120	121			115.133	19.6695
Thickness (nm)- Outer layer	WT	47	51.1	38.5	70.3	44.2	57.5	53.5	47.6	59.6	57	68.6	77.5	60.4	57.5	65.2	50.2	40	41.9	62.7	41.9	43.6	47.9	52.4	61.7	40.6	46.5	62.7	49.6	45.8	46.1	50.9	47	49.6	57.1	46.5	42.8	67.3					52.7108	9.61569
	kre6Δ/Δ	79.5	49.2	57.5	55.4	51.9	43.4	89	64.5	54.4	61	76.8	32.8	38.7	42.8	36.2	32.3	36.7	41.8	31	34.3	46.7	46.7	46.4	47.9	56.5	63.5	75.7	70.5	47	39.5	31.2	33.3	40	50	59.2	78	51.1	54.8	55.8	61.4		51.61	14.8262
	kre62Δ/Δ	42.1	40.6	39.5	49.7	62.7	36.7	44.1	43.4	46	52.2	38.1	47	53.5	52.2	31	32.8	55.4	44.4	49.6	38.9	44.2	77.2	69.7	49.7	51.1	43.2	52.2	63.8	53	52.2	61.8	61.3	61	59.3	55.8	48.5	47.6					50.0405	10.057
	skn1Δ/Δ	100	70	68	73	63	74	73.3	45.4	63	71.1	85.3	76.3	83.1	75.2	62.5	61.6	80.8	81	83.1	64.1	79.4	65.8	83	73	70.2	86.2	84.6	85.9	44.2	70.8	62.2	57	52	57	58.3	57.2	66.5					70.4622	12.2409
	skn2Δ/Δ	71	89	74.3	64.7	63.5	62	70.1	57.7	57.7	57.4	43	45.1	79.2	65.8	72.6	54.7	58.1	41.9	57.5	77	52.4	91.6	60.4	58.2	74.9	69.7	72.6	69	63.1	89.7	76.7	85.2	77.6	72	69.7	41.3	64.7	62.7	61.5			66.0333	12.5463
	kre6/skn1Δ/Δ	47	46.5	44.9	55.2	34.9	31.2	33.8	37.2	44.9	41.9	0	0	0	0	0	40.6	58.2	33.3	34.8	42.4	48.3	36.7	61.1	43.6	45.1	46	61.8	43.6	50.1	50.2	47	40.6	46	50.1	32.8	36.7	58.1	86.4	90.5	63.4		41.6225	20.2233
	kre6/skn1/kre62/skn2Δ/Δ	0	0	0	0	0	0	0	0	0	0	0	0	0	0	0	0	0	0	0	0	0	0	0	0	0	0	0	0	0	0	0	0	0	0	0	0	0	0	0	0		0	0
	kre6/skn1/kre62/skn2Δ/Δ+PACT1-KRE6	37.8	41.3	53.6	51.6	50.9	46.1	59.7	58.1	60.2	52.2	55.9	62	55.1	46	53.5	44.4	54.4	64.5	63.1	54.4	56.2	58.8	40.6	50	51	49.7	44.7	47	80.2	67.5	69	67.3	65.7	50.9	74.1	61	82.5	60.4	67.4			56.6359	10.2976
