# Supplementary material for: β-1,6-Glucan plays a central role in the structure and remodeling of the bilaminate fungal cell wall
Source: eLife. 2024 Dec 5;13:RP100569. doi: 10.7554/eLife.100569 (PMC11620752; doi:10.7554/eLife.100569)
Supplement: Figure 6—figure supplement 1—source data 1. [file elife-100569-fig6-figsupp1-data1.xlsx]

## Sheet: Panel a
Cytokines (pg/mL)	Donors	Medium	β-1,6-glucan control			β-1,6-glucan caspofungin			β-1,6-glucan lactate			LPS
			Batch 1	Batch 2	Batch 3	Batch 1	Batch 2	Batch 3	Batch 1	Batch 2	Batch 3
IL-8	D1	19961.3	27474.2	20193.5	19935.5	22190.3	21087.1	21029	28083.9	25148.4	24745.2	44535.5
	D2	15325.8	21061.3	17912.9	16048.4	17187.1	18287.1	17029	23932.3	19132.3	17971	39138.7
	D3	14429	42835.5	42716.1	39454.8	39109.7	36767.7	41412.9	32958.1	30919.4	27271	39887.1
	D4	2422.58	41796.8	32825.8	29912.9	24796.8	20200	17212.9	22112.9	9825.81	8412.9	40580.6
	D5	2674.19	14309.7	15358.1	12216.1	8441.94	9874.19	9890.32	15912.9	10567.7	17238.7	38303.2
	D6	3367.74	11232.3	14364.5	11422.6	8161.29	10551.6	7687.1	13148.4	10158.1	7164.52	32700
	D7	2409.68	14712.9	13087.1	8922.58	7483.87	9267.74	16951.6	23532.3	21519.4	23096.8	41380.6
	D8	1316.13	13819.4	12683.9	19583.9	6251.61	5554.84	12012.9	25748.4	26425.8	20983.9	38471
IL-6	D1	3744.64	6175.78	3812.11	3887.54	4150.52	4483.05	3997.23	6258.82	4860.9	4565.05	9670.24
	D2	1503.81	3235.64	2396.54	1768.17	1934.26	1936.33	1673.7	3352.25	1764.36	1511.76	8671.63
	D3	2039.79	8809	9004.15	8615.92	8400	8054.32	8408.3	8124.91	6579.93	4769.55	9290.31
	D4	48.4429	9058.13	7086.85	4968.17	5694.81	972.318	504.498	4057.44	556.401	115.917	9533.91
	D5	55.3633	116.263	883.737	84.4291	75.4325	88.9273	76.4706	764.014	134.256	754.671	9055.36
	D6	60.2076	153.979	1524.22	285.121	213.495	102.768	77.8547	961.938	119.377	90.6574	7158.48
	D7	74.0484	3242.91	2029.07	601.038	425.952	632.526	2574.05	5905.54	3767.82	4126.64	9110.73
	D8	69.8962	525.606	1046.37	3155.02	107.612	91.0035	768.166	3876.82	4187.54	1228.03	8838.75
TNF-alpha	D1	622.807	1362.57	618.056	569.444	639.254	625	615.863	1053.73	696.637	707.602	13404.2
	D2	313.596	339.181	324.561	309.942	322.368	306.652	299.342	352.705	297.149	305.19	3620.25
	D3	589.912	6560.31	8315.42	6339.18	4793.49	5793.86	4791.3	4579.68	2290.94	803.363	5566.15
	D4	256.944	2526.68	1061.77	440.789	705.775	288.012	275.585	674.708	324.927	274.123	5286.18
	D5	252.193	260.965	287.646	252.558	257.675	258.406	258.772	310.673	255.848	293.86	6072.37
	D6	266.813	290.936	434.211	278.874	284.357	277.778	269.737	445.541	284.357	281.433	4208.33
	D7	275.219	673.246	536.915	377.924	320.175	355.629	480.629	1509.14	840.278	744.883	8428.36
	D8	253.289	266.813	277.047	355.994	266.447	258.772	271.199	363.304	367.325	289.474	2649.85
IL-1bêta	D1	200.296	1051.7	212.296	196.37	302.889	242.148	215.926	1277.78	536.963	339.852	3603
	D2	44.6667	102.148	69.037	39.9259	54.6667	44.8148	43.1852	127.852	46.6667	35.8519	2014.56
	D3	235.704	1447.33	1865.19	1438.96	1276.07	1291.63	1302.74	2256.44	1114.07	266.444	3669.89
	D4	18.8889	1454.15	484.889	119.556	338.815	25.4074	22	559.037	58.8148	20.6667	3853.78
	D5	21.1111	21.7037	30.963	21.4815	26.2963	15.9259	19.6296	57.2593	21.3333	24.2222	3860.44
	D6	22.2963	29.7037	87.1111	26.0741	23.6296	21.037	18.8889	103.926	20.6667	16.8889	3447.11
	D7	22.8148	288.963	199.259	74.8148	58.2222	65.1852	505.185	1103.85	450.667	407.481	3675.22
	D8	14.5185	19.3333	42.8889	104.815	10.1481	14	24.963	151.778	138	5.40741	2436
IL-10	D1	187	338	172	130	531	170	177	288	206	211	5486
	D2	141	201	137	144	102	151	132	220	140	170	4237
	D3	89	587	679	576	444	564	465	467	276	136	5319
	D4	58	1653	698	355	386	246	164	259	108	78	6284
	D5	69	76	77	73	45	74	72	65	75	76	4214
	D6	270	398	57	40	53	59	68	66	57	86	626
	D7	89	283	319	110	99	126	172	422	279	286	7443
	D8	82	103	106	164	82	78	94	199	196	129	3479

## Sheet: Panel b
Cytokines (pg/mL)	Donors	Medium	β-1,6-glucan control			β-1,6-glucan caspofungin			β-1,6-glucan lactate			LPS
			Batch 1	Batch 2	Batch 3	Batch 1	Batch 2	Batch 3	Batch 1	Batch 2	Batch 3
IL-8	D1	229.878	197.561	157.622	172.256	163.11	155.488	147.256	151.829	151.524	171.341	1142.07
	D2	115.244	160.671	109.146	122.256	111.585	112.805	116.463	136.89	125.915	128.659	1303.96
	D3	221.646	192.073	176.829	192.988	184.451	186.28	208.232	193.293	186.28	173.476	1018.29
	D4	96.0366	102.134	102.134	98.1707	104.878	99.3902	96.3415	107.927	107.317	111.28	425.915
	D5	208.232	191.159	176.829	179.268	174.085	173.78	163.415	213.11	212.805	184.451	986.585
	D6	120.122	124.695	125.915	136.89	127.439	125.305	122.866	162.5	128.354	118.293	1275.91
	D7	97.561	102.134	99.3902	105.488	113.415	93.5976	97.8659	136.28	107.927	100	303.354
	D8	102.744	156.402	100	104.878	118.902	139.024	130.488	160.671	103.963	96.0366	345.122
