# Supplementary material for: β-1,6-Glucan plays a central role in the structure and remodeling of the bilaminate fungal cell wall
Source: eLife. 2024 Dec 5;13:RP100569. doi: 10.7554/eLife.100569 (PMC11620752; doi:10.7554/eLife.100569)
Supplement: Figure 6—figure supplement 4—source data 1. [file elife-100569-fig6-figsupp4-data1.xlsx]

## Sheet: Panel a
IL-8 immune response (%)
w/ NHS	w/o NHS
100	16.5095
100	12.721
100	0
100	1.30624
100	13.0523
100	4.295

## Sheet: Panel b
	OD 450 nm
	50 μg per well			25 μg per well			12.5 μg per well
AI-Fraction	0.82675	0.7989	0.7857	0.69735	0.68745	0.71235	0.549	0.50445	0.5156
AI-Fraction OxP	0.53935	0.53525	0.5466	0.4605	0.49195	0.48869	0.246	0.2397	0.2552
β-1,6-glucan	0.79375	0.7747	0.8036	0.63825	0.6595	0.65205	0.4938	0.4896	0.49405
