# Supplementary material for: β-1,6-Glucan plays a central role in the structure and remodeling of the bilaminate fungal cell wall
Source: eLife. 2024 Dec 5;13:RP100569. doi: 10.7554/eLife.100569 (PMC11620752; doi:10.7554/eLife.100569)
Supplement: Figure 6—source data 1. [file elife-100569-fig6-data1.xlsx]

## Sheet: Panel a
Cytokines (pg/mL)	Donors	Medium	AI-Fraction			AI-Fraction OxP			β-1,6-glucan			LPS
			Batch 1	Batch 2	Batch 3	Batch 1	Batch 2	Batch 3	Batch 1	Batch 2	Batch 3
MCP-1	D1	7496.36	11934.5	10621.8	11350.9	9630	9610.91	10420	9800.91	7490.91	8935.45	3264.55
	D2	1979.09	9454.55	8938.18	8294.55	10405.5	9686.36	10908.2	2459.09	2242.73	4797.27	298.182
	D3	2047.27	9935.45	10050	10108.2	10096.4	10275.5	10867.3	12694.5	12772.7	13096.4	1775.45
	D4	220	12013.6	11312.7	12024.5	10560.9	10613.6	11161.8	10855.5	12310	12375.5	948.182
	D5	418.182	10053.6	9248.18	9500	8564.55	8373.64	9626.36	8537.27	10855.5	10370.9	5895.45
	D6	5474.55	1174.55	1401.82	876.364	2818.18	2803.64	2840.91	9983.64	7051.82	8716.36	4367.27
	D7	634.545	9456.36	9828.18	10072.7	9455.45	9890	10049.1	10416.4	6813.64	8397.27	4260.91
	D8	0	6914.55	8355.45	9210.91	6795.45	6956.36	7801.82	5139.09	5783.64	1410.91	424.545
C5a	D1	30853.2	39737.8	38465.8	35894.3	35002	32821.9	33859.1	33127.2	33518.6	29166.3	27866.9
	D2	30747.6	36234.8	34728	34845.4	30900.2	30101.8	30168.3	32649.7	27722.1	29542.1	29182
	D3	22172.2	60293.5	59745.6	61530.3	56888.5	57127.2	59765.2	57960.9	58137	42806.3	24156.6
	D4	19565.6	55733.9	60019.6	60262.2	54767.1	52411	54156.6	53037.2	53992.2	52622.3	27095.9
	D5	33831.7	60324.9	57463.8	57639.9	52215.3	53866.9	54728	32305.3	29729.9	30203.5	24332.7
	D6	26211.4	59820	55197.7	56242.7	53761.3	56720.2	54641.9	44829.7	41283.8	42575.3	20825.8
	D7	13389.4	56113.5	53311.2	54998	35319	29530.3	37628.2	20383.6	18575.3	14806.3	27342.5
	D8	12117.4	45448.1	48778.9	48137	23917.8	27843.4	27929.5	16700.6	20301.4	18383.6	10802.3
IL-6	D1	2522.74	6302.81	5555.8	5155.92	3147.36	3749.47	3130.83	3746.66	2678.55	3900	9639.39
	D2	1929.07	8418.99	8668.35	8544.9	6458.27	7082.88	6907.39	2198.12	1947.01	2684.17	8945.84
	D3	51.3482	5652.17	5965.89	5589.21	4625.56	4619.93	4044.2	8573.74	8427.08	8989.1	9426.26
	D4	144.9	2896.6	2839.62	2782.3	1637.16	1664.95	1476.44	8244.2	6703.75	4453.93	9338.69
	D5	45.3693	1981.13	1808.09	2020.16	1713.13	1840.8	2019.81	170.926	101.641	66.823	9118.52
	D6	634.115	1242.56	1770.46	1655.45	529.66	509.965	660.492	93.5522	70.34	68.2298	7315.36
	D7	53.1067	9932.36	9608.09	8922.63	6262.02	5775.26	5319.46	3004.57	1019.23	711.137	9805.04
	D8	50.9965	10033.6	9285.23	7865.77	5809.73	5076.44	5070.81	1460.26	2541.03	501.172	8912.07
IL-1bêta	D1	77.4532	1519.1	1275.36	1071.91	347.79	505.094	341.573	305.918	98.9513	262.022	4134.61
	D2	36.2547	1385.99	1668.39	1657.3	747.116	1078.8	891.161	39.8502	37.0037	60.1498	2067.98
	D3	24.1948	1274.91	1334.76	1140.9	731.236	783.446	570.412	1493.11	1570.56	1814.23	3185.06
	D4	63.0712	252.06	233.258	256.629	160.974	146.292	150.787	925.169	585.169	45.4682	3347.42
	D5	28.6891	228.315	226.217	261.498	142.622	163.82	201.423	28.4644	29.7378	26.9663	3430.67
	D6	61.1985	435.73	580.3	728.315	134.682	127.341	163.221	27.4157	24.794	24.9438	2837.3
	D7	24.4195	2587.42	2597.15	2425.84	1792.13	1603.45	1360.6	181.423	65.0936	58.0524	4046.85
	D8	22.6217	2643.52	2476.4	1419.55	885.918	686.891	657.079	37.7528	79.5506	26.8914	1803.37
IL-8	D1	17305.5	40315.1	39707.4	36350.5	20858.5	24183.3	25353.7	16537	18080.4	17749.2	44321.5
	D2	15321.5	46729.9	45955	45164	40704.2	41475.9	41855.3	15540.2	15463	15800.6	33643.1
	D3	3012.86	37996.8	38881	37173.6	31209	32893.9	31045	39504.8	39167.2	41398.7	35530.5
	D4	3974.28	37427.7	34305.5	36350.5	23697.7	23180.1	23077.2	40427.7	31196.1	30334.4	34627
	D5	2025.72	23385.9	21858.5	23630.2	22382.6	21260.4	22083.6	13768.5	11495.2	10202.6	25289.4
	D6	7337.62	18366.6	18758.8	18601.3	16147.9	15971.1	16263.7	9694.53	8282.96	8791	19212.2
	D7	3109.32	43983.9	44000	44186.5	27430.9	26273.3	25395.5	16086.8	9041.8	7881.03	35366.6
	D8	1212.22	45495.2	46083.6	43829.6	35533.8	28459.8	33328	14112.5	16627	8639.87	31983.9
TNF-alpha	D1	477.273	8408.54	8318.74	7499.45	3379.71	4177.38	3445.68	595.344	504.435	641.907	15913.5
	D2	355.876	6034.92	7662.97	8582.59	3349.22	4200.67	3835.37	380.82	368.071	378.049	4984.48
	D3	315.965	11872	12319.8	11911.3	7299.33	7405.21	6126.39	8306.54	8211.2	10616.4	5740.02
	D4	329.823	1510.53	1506.65	1685.14	1178.49	1125.28	1223.39	1948.45	1376.94	415.188	5498.89
	D5	309.313	3502.77	3375.28	3551.55	2399.67	2278.82	2695.68	343.126	332.594	318.182	7132.48
	D6	386.918	1920.18	2078.71	2333.15	1242.79	1338.14	1350.33	349.224	347.561	368.625	5525.5
	D7	331.486	17582	13322.1	8961.75	5375.83	4685.14	4466.19	697.339	450.111	426.275	9406.87
	D8	312.639	13357	8452.88	4310.98	2657.43	2303.77	2693.46	361.419	391.353	342.018	3284.92
IL-10	D1	133	282	196	167	462	161	133	159	196	149	5553
	D2	129	1736	2241	2064	999	1273	965	132	100	144	3923
	D3	82	152	138	117	114	129	129	569	595	728	5185
	D4	105	269	254	240	127	159	132	987	654	296	4877
	D5	104	131	116	97	79	106	95	103	106	105	4333
	D6	64	62	65	45	33	36	49	64	95	59	465
	D7	80	4268	3253	1644	535	521	424	189	139	133	7669
	D8	79	10181	6431	2802	1376	1259	1015	121	144	94	3557
MIP-1bêta	D1	3130	16186.7	15902.2	16071.1	14204.4	15113.3	13945.6	5120	3836.67	5525.56	16897.8
	D2	2652.22	16682.2	17193.3	17173.3	17072.2	17102.2	16822.2	3683.33	2924.44	4930	16288.9
	D3	502.222	15010	15346.7	15078.9	14366.7	14445.6	13237.8	14131.1	12044.4	15062.2	15726.7
	D4	245.556	7916.67	7965.56	8207.78	5990	5893.33	6863.33	8122.22	5602.22	1101.11	16413.3
	D5	170	11041.1	12011.1	11751.1	10872.2	7830	10877.8	467.778	282.222	246.667	15856.7
	D6	1417.78	5127.78	4765.56	5072.22	4544.44	4493.33	5072.22	1306.67	1038.89	886.667	11934.4
	D7	345.556	15384.4	15385.6	15085.6	14493.3	14360	14875.6	2512.22	1134.44	1357.78	14517.8
	D8	52.2222	11140	12042.2	13752.2	13127.8	12994.4	12727.8	737.778	1561.11	385.556	11524.4
RANTES	D1	1695.71	3962.38	3984.29	4073.33	3586.67	3579.05	3502.86	2352.38	2627.62	2151.43	5056.67
	D2	2244.29	4981.9	4851.43	4799.05	5150.95	5132.38	4763.33	2990.95	2648.1	2924.29	4879.05
	D3	1202.38	3974.29	4150	3876.67	3824.29	3849.52	3978.57	3180	3159.05	3371.9	4683.33
	D4	1038.1	1920.95	2544.29	2598.1	2063.81	2295.71	1974.29	1911.9	1550	1123.81	3821.43
	D5	1135.24	3047.62	3090.95	2954.29	3070	3494.29	3073.81	1316.19	1211.43	1134.29	3894.29
	D6	1063.81	2906.19	3057.62	2978.1	2833.81	2742.38	3053.33	1329.05	1271.9	1293.81	3352.86
	D7	1690.95	6509.52	5892.86	5460	5026.67	4669.52	4980.95	2041.9	1804.29	1745.71	5936.67
	D8	1365.24	5441.43	5301.43	5605.71	4678.1	4463.33	4723.81	1690.48	1498.1	1700.48	4728.57

## Sheet: Panel b
Cytokines (pg/mL)	Donors	Medium	AI-Fraction			AI-Fraction OxP			β-1,6-glucan			LPS
			Batch 1	Batch 2	Batch 3	Batch 1	Batch 2	Batch 3	Batch 1	Batch 2	Batch 3
IL-8	D1	152.745	448.389	364.558	334.726	597.852	451.969	469.57	238.962	196.002	214.2	1617.84
	D2	139.916	328.461	430.191	459.427	572.792	533.711	593.377	180.788	138.425	136.933	1871.72
	D3	202.267	246.122	226.73	250.298	289.081	335.919	340.99	216.885	202.566	207.637	1447.2
	D4	109.189	247.613	263.723	320.107	320.107	451.372	294.451	117.243	116.945	116.647	548.329
	D5	190.931	533.711	629.475	915.274	823.091	947.196	919.749	199.881	195.406	187.351	1286.69
	D6	133.353	251.193	212.709	363.067	366.05	334.129	312.351	133.652	122.912	130.668	1730.01
	D7	120.525	1227.92	1122.91	1027.74	559.069	534.01	483.89	118.735	107.995	102.327	432.876
	D8	152.148	624.403	448.389	566.527	338.604	308.174	319.212	172.136	110.382	102.625	437.351
