# Supplementary figures and images for: β-1,6-Glucan plays a central role in the structure and remodeling of the bilaminate fungal cell wall
Source: eLife journal article supplement (doi:10.7554/elife.100569), 2024-09-02

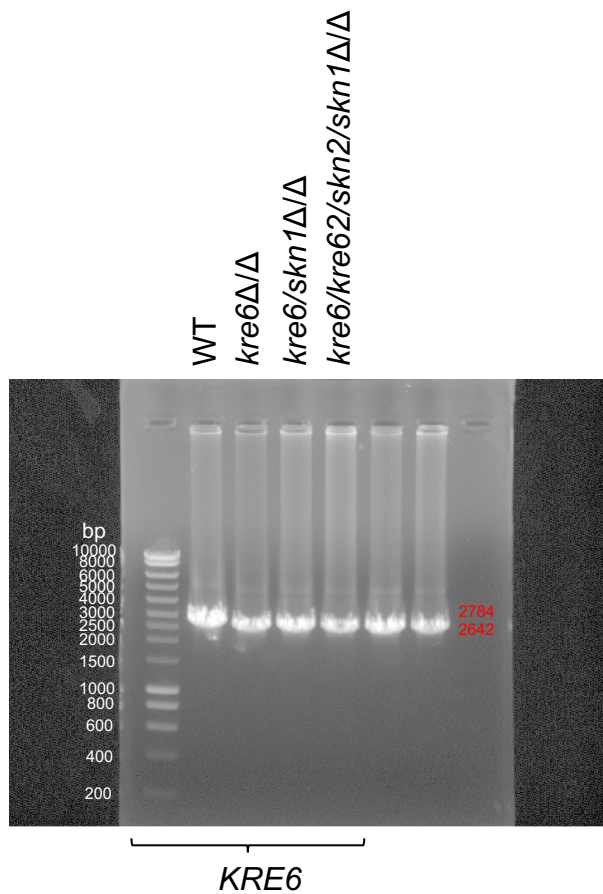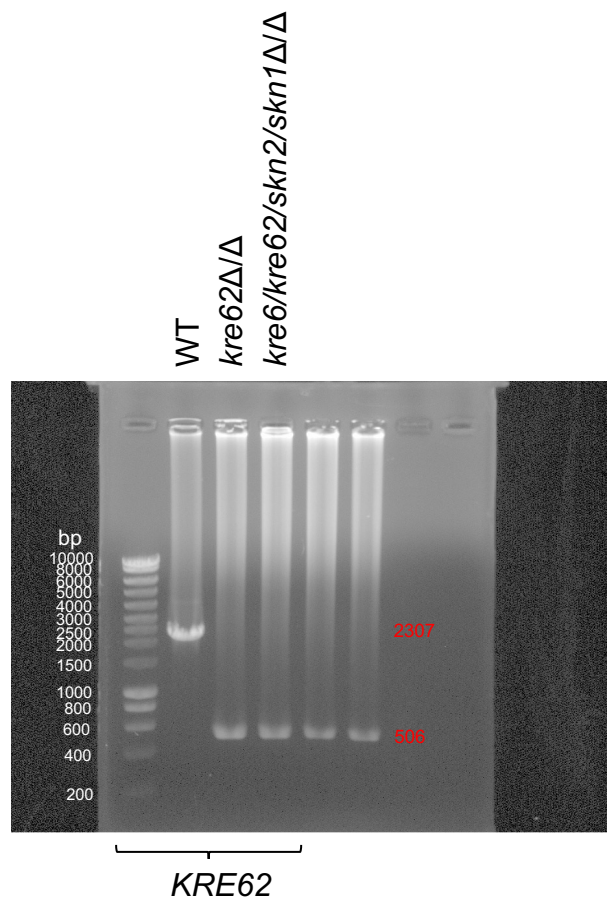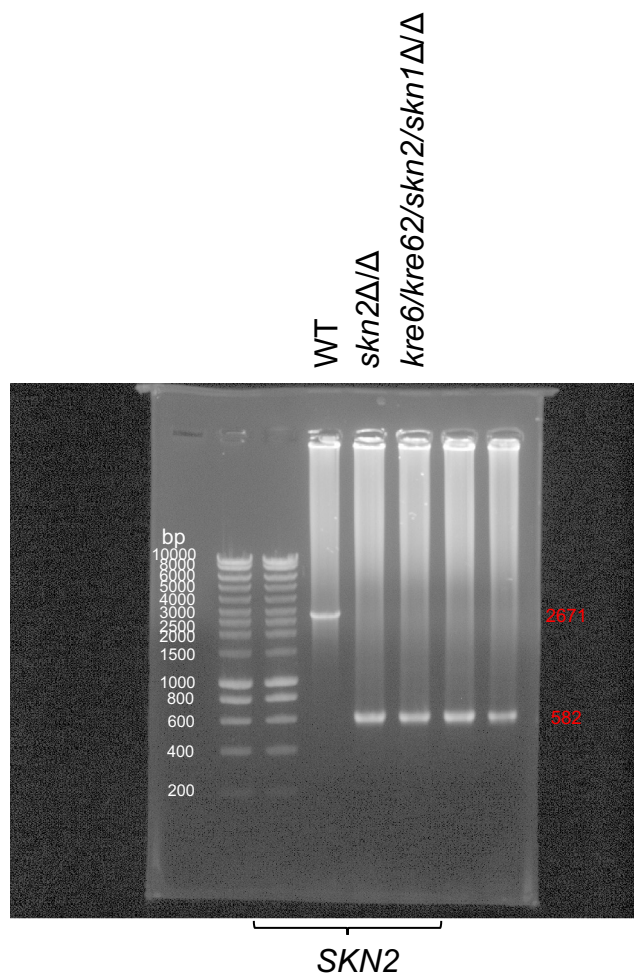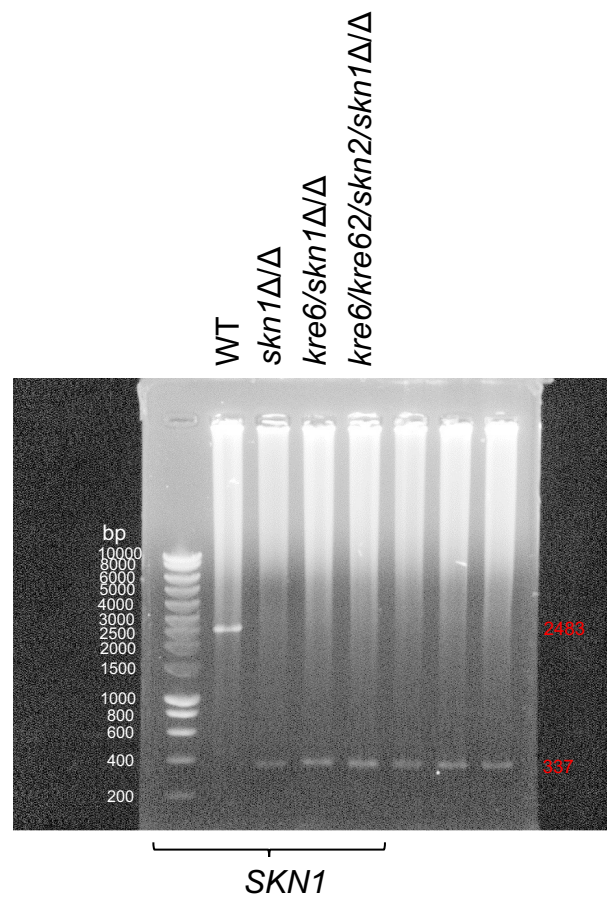

Supplement: fig4-figsupp1-data1 [file elife-100569-fig4-figsupp1-data1-v1.zip]

*kre6/kre62/skn2/skn1Δ/Δ + P<sub>ACT1</sub>-KRE6*

WT

bp  
10000  
8000  
6000  
5000  
4000  
3000  
2500  
2000  
1500  
1000  
800  
600  
400  
200

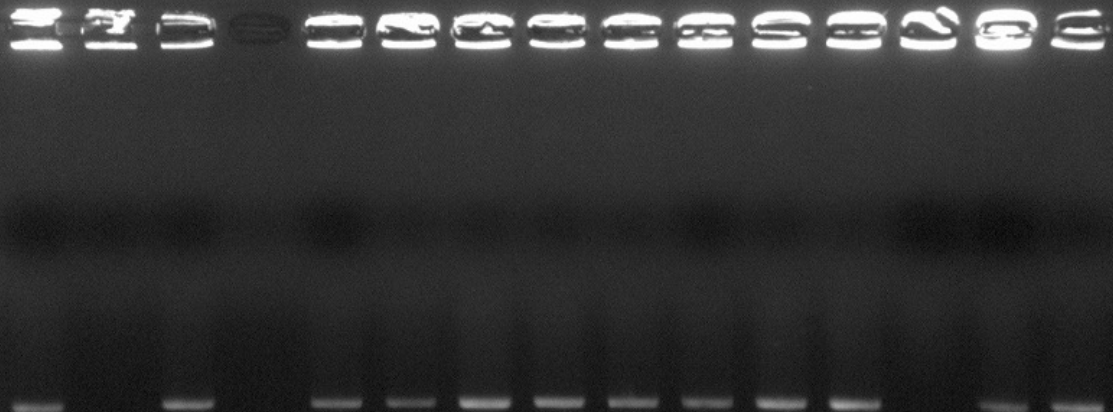

Supplement: fig4-figsupp2-data1 [file elife-100569-fig4-figsupp2-data1-v1.zip]

Medium

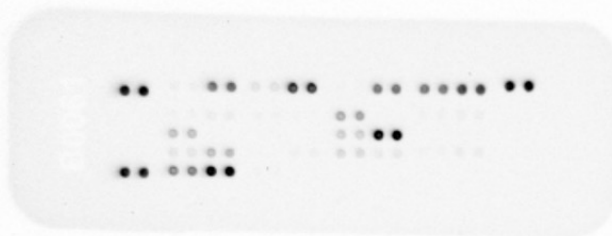

AI Fraction

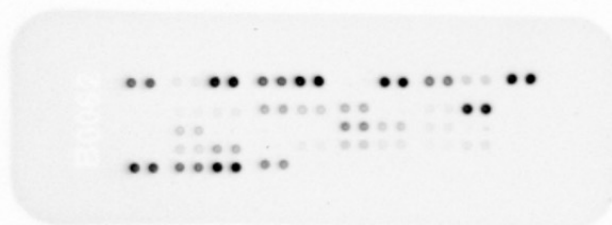

AI-OxP Fraction

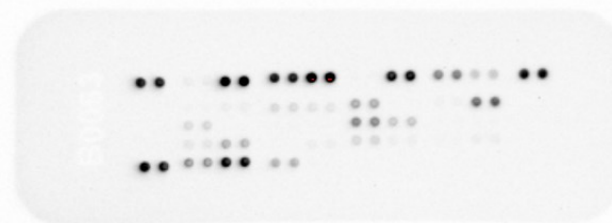

$\beta$ -1,6-glucan

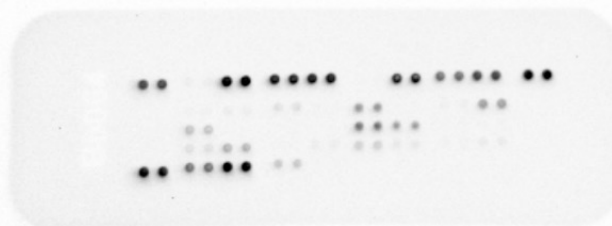

Supplement: fig6-figsupp2-data1 [file elife-100569-fig6-figsupp2-data1-v1.zip]

Medium

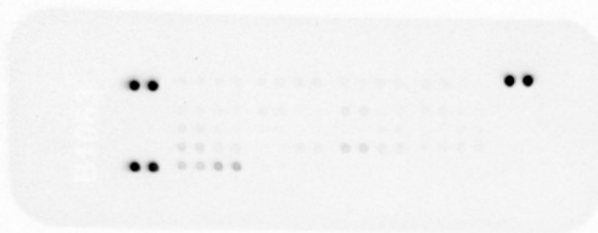

AI Fraction

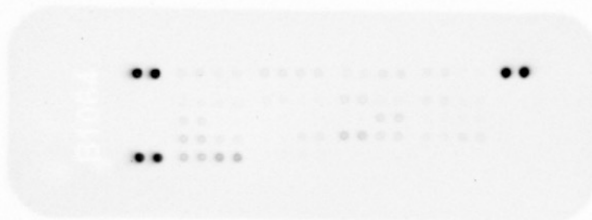

AI-OxP Fraction

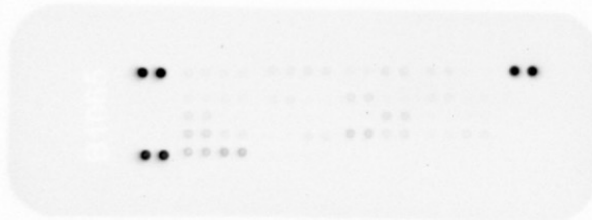

$\beta$ -1,6-glucan

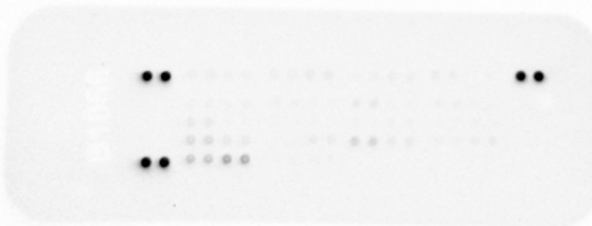

Supplement: fig6-figsupp3-data1 [file elife-100569-fig6-figsupp3-data1-v1.zip]
